# Supplementary material
Source: PubMed Central journal article supplement (PMC7293612)
Supplement: pnas.2000333117.sapp.pdf [file pnas.2000333117.sapp.pdf]

Supplementary Materials for

**As diversity increases, people paradoxically perceive social groups as more similar**

Xuechunzi Bai, Miguel R. Ramos, Susan T. Fiske

Correspondence to: [sfiske@princeton.edu](mailto:sfiske@princeton.edu)

Open access to material, data, code, figure, and pre-registration at *here*.

## **Supplementary Information**

|                                                                              |           |
|------------------------------------------------------------------------------|-----------|
| 0. Study 0 Mental map of stereotype content model: an illustration           | <b>3</b>  |
| 1. Study 1 stereotype dispersion and ethnic diversity in 46 nations          | <b>7</b>  |
| 2. Study 2 stereotype dispersion and ethnic diversity in 50 states in the US | <b>11</b> |
| 3. Study 2 demographics of online American participants                      | <b>12</b> |
| 4. Study 2 stereotype dispersion by ethnic group                             | <b>16</b> |
| 5. Study 2 multilevel regression and state random effects                    | <b>20</b> |
| 6. Study 2 mediation analysis                                                | <b>22</b> |
| 7. Study 3 derivation of diff-in-diff estimator                              | <b>23</b> |
| 8. Study 3 robustness check                                                  | <b>32</b> |
| 9. Stereotype dispersion and well-being                                      | <b>34</b> |
| 10. Stereotype dispersion and positivity                                     | <b>36</b> |
| 11. Ingroup favoritism                                                       | <b>37</b> |
| 12. Diversity perception accuracy                                            | <b>38</b> |

0. Study 0 mental map of stereotype content model: an illustration

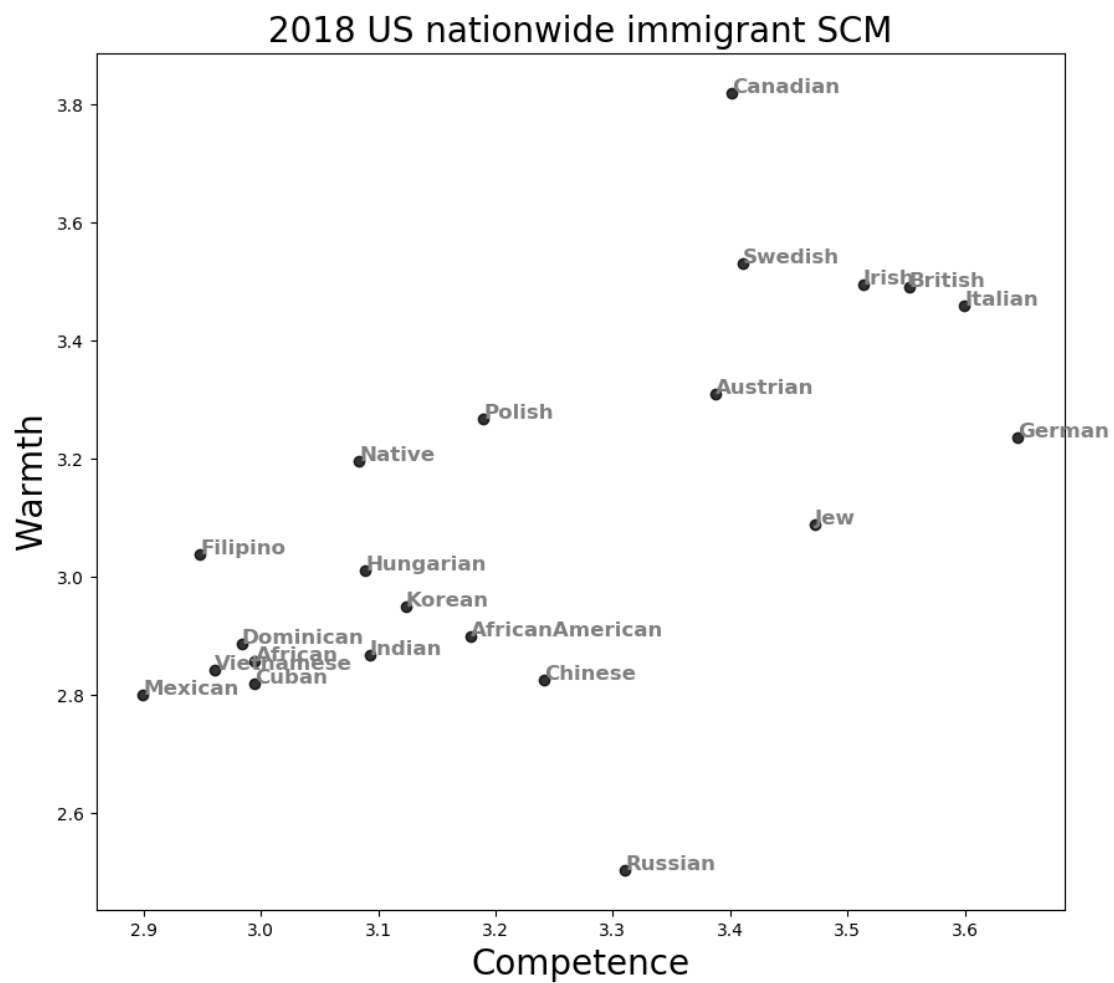

Fig.S 1 – Stereotype content model in the US

*Note.* American online participants ( $N = 1502$ ) gave ratings on perceived competence and warmth of the 20 largest immigrant groups in the United States. Each dot represents how an immigrant groups is perceived by individuals in that society. The main analysis rests (Euclidean norm) on similar stereotype content maps, but varies at the level of responses and social groups. See main text for details.

## 1. Study 1 stereotype dispersion and ethnic diversity in 46 nations

Table.S 1 – Stereotype dispersion and ethnic diversity in 46 nations

| Country     | Stereotype dispersion | Ethnic diversity | GDP        | GINI | Year | Country       | Stereotype dispersion | Ethnic diversity | GDP         | GINI | Year |
|-------------|-----------------------|------------------|------------|------|------|---------------|-----------------------|------------------|-------------|------|------|
| Afghanistan | 0.7481                | 0.7693           | 612.0697   | 34.4 | 2014 | Japan         | 0.6622                | 0.0119           | 37217.6487  | 30.2 | 2005 |
| Armenia     | 0.8941                | 0.1272           | 3614.7000  | 34.6 | 2017 | Jordan        | 0.7961                | 0.5926           | 3992.8671   | 39.3 | 2013 |
| Australia_w | 0.8110                | 0.0929           | 42742.9990 | 33.1 | 2009 | Kazakhstan    | 0.6676                | 0.6171           | 7713.6000   | 28   | 2017 |
| Belarus     | 0.6468                | 0.3222           | 4986.5000  | 22.8 | 2017 | Kenya_w       | 0.6876                | 0.8588           | 1335.0646   | 42.1 | 2014 |
| Belgium     | 0.6747                | 0.5554           | 36967.2829 | 26.3 | 2005 | Lebanon       | 1.4327                | 0.1314           | 8406.2852   | 38   | 2013 |
| Bolivia_w   | 0.7620                | 0.7396           | 1776.8665  | 46.1 | 2009 | Malaysia      | 0.8795                | 0.588            | 8513.6295   | 43.9 | 2008 |
| Canada      | 0.6224                | 0.7124           | 46596.3360 | 31.3 | 2008 | Mexico        | 0.9445                | 0.5418           | 7986.7984   | 46.1 | 2005 |
| Chile       | 1.1177                | 0.1861           | 10243.3282 | 47.9 | 2009 | NewZealand_w  | 0.8681                | 0.3969           | 28200.9419  | 32   | 2009 |
| China       | 0.6498                | 0.1538           | 7683.5000  | 51.5 | 2014 | Norway        | 0.8208                | 0.0586           | 102910.4350 | 24.6 | 2013 |
| Costa Rica  | 0.7239                | 0.2368           | 4697.0111  | 44.4 | 2005 | Pakistan      | 0.6587                | 0.7098           | 1272.4411   | 35.7 | 2013 |
| Denmark     | 1.1910                | 0.0819           | 62425.5392 | 25.3 | 2014 | Peru          | 0.4995                | 0.6566           | 4166.0934   | 48.4 | 2009 |
| Egypt       | 0.7201                | 0.1836           | 3213.3892  | 47.2 | 2013 | Portugal      | 1.0489                | 0.0468           | 22780.0585  | 35.3 | 2007 |
| England     | 0.9866                | 0.1211           | 46523.2655 | 34   | 2008 | Russia        | 0.9784                | 0.2452           | 8748.4000   | 42.1 | 2017 |
| Finland     | 0.9580                | 0.1315           | 49914.6186 | 25.5 | 2014 | South Africa  | 0.3909                | 0.7517           | 5414.6343   | 58   | 2005 |
| Georgia     | 0.7594                | 0.4923           | 3865.8000  | 40.4 | 2017 | South Korea   | 0.6597                | 0.002            | 18639.5222  | 30.2 | 2005 |
| Germany     | 0.8458                | 0.1682           | 34696.6209 | 28.2 | 2005 | Spain         | 1.1565                | 0.415            | 35578.7362  | 32.4 | 2008 |
| Greece      | 1.1896                | 0.1576           | 31997.2820 | 32.6 | 2008 | Sweden        | 1.0426                | 0.06             | 59180.1990  | 25.8 | 2014 |
| HongKong    | 0.7134                | 0.062            | 26649.7508 | 40.9 | 2005 | Switzerland_w | 0.8436                | 0.5314           | 69672.0047  | 29.6 | 2009 |
| India       | 0.6149                | 0.4182           | 1345.7702  | 48   | 2010 | Turkey        | 0.6946                | 0.32             | 12542.9357  | 40.4 | 2013 |
| Iran        | 0.7827                | 0.6684           | 5424.3100  | 37.9 | 2014 | Uganda        | 0.8970                | 0.9302           | 647.0108    | 38.9 | 2009 |
| Iraq        | 0.6060                | 0.3689           | 6925.2240  | 34.5 | 2013 | Ukraine       | 0.9856                | 0.4737           | 2185.7000   | 25   | 2017 |
| Israel_w    | 0.4289                | 0.3436           | 20611.1793 | 36.6 | 2005 | US_w          | 0.7510                | 0.4901           | 48373.8788  | 37   | 2010 |
| Italy_w     | 0.8397                | 0.1145           | 31959.2622 | 32.5 | 2005 | Uzbekistan    | 0.4984                | 0.4125           | 2110.6000   | 35.2 | 2017 |

*Note.* See calculations and data source in the main text for each variable. *w* denotes aggregate results from multiple regions (e.g., French, German, and Italian Canton in Switzerland) or multiple samples (e.g., students and adults in Italy) in one country. Year denotes data collection time for stereotype content model research (Fiske et al., 2002).

Fig.S 2 – Stereotype dispersion in 46 nations

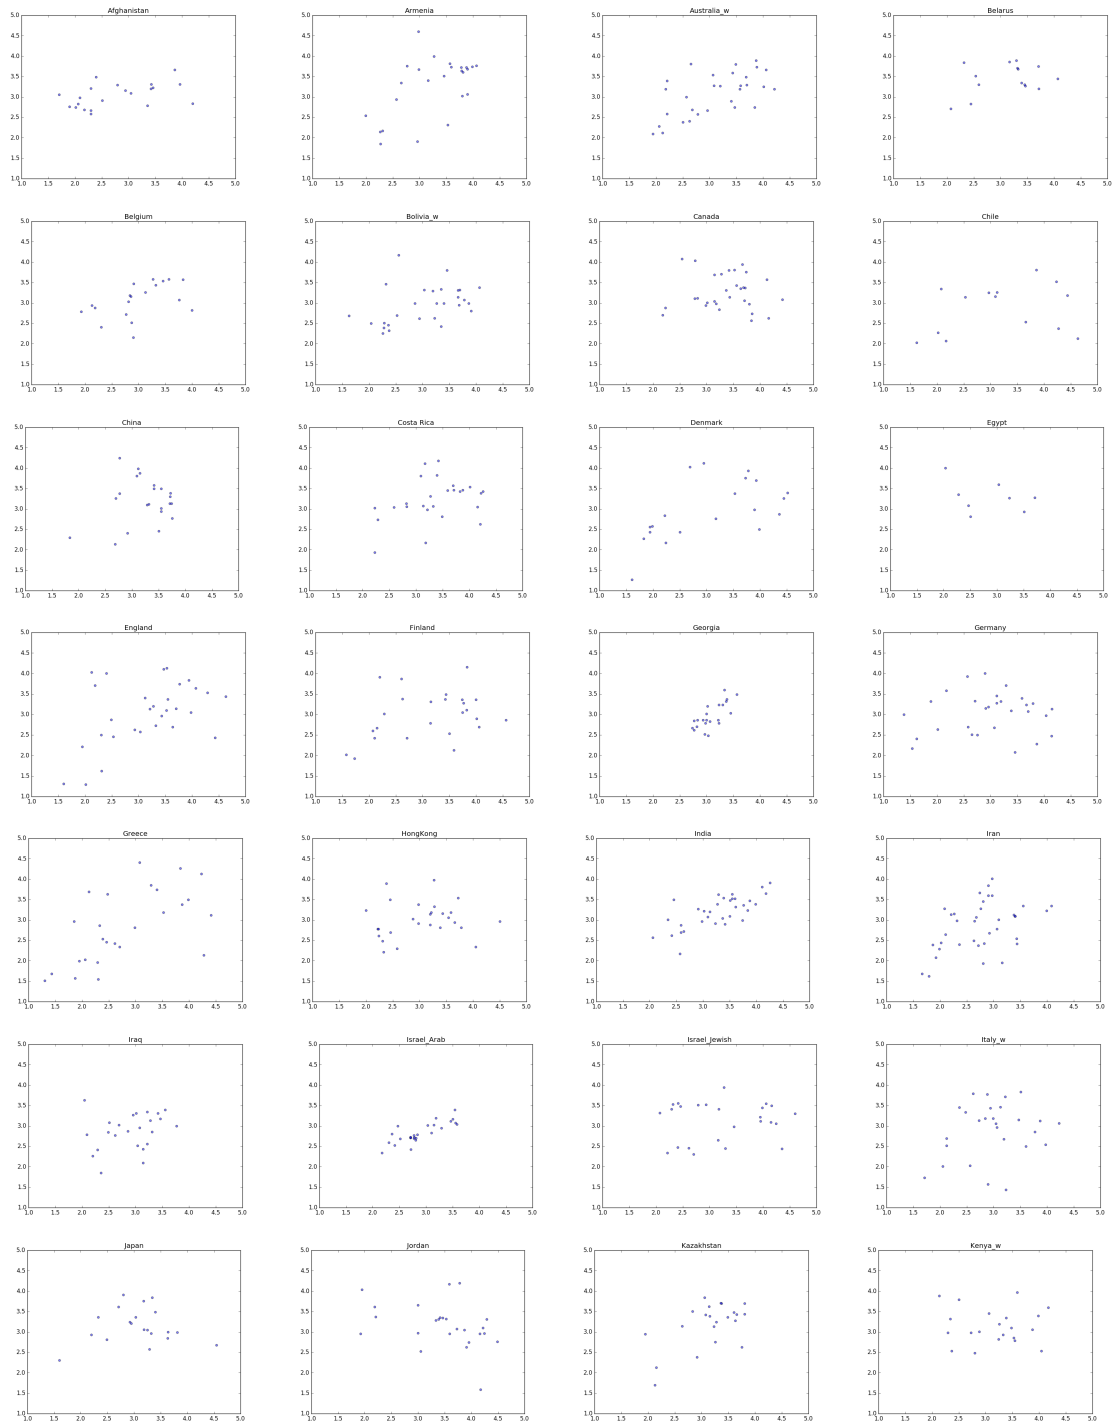

Fig.S 3 – Stereotype dispersion in 46 nations cont.

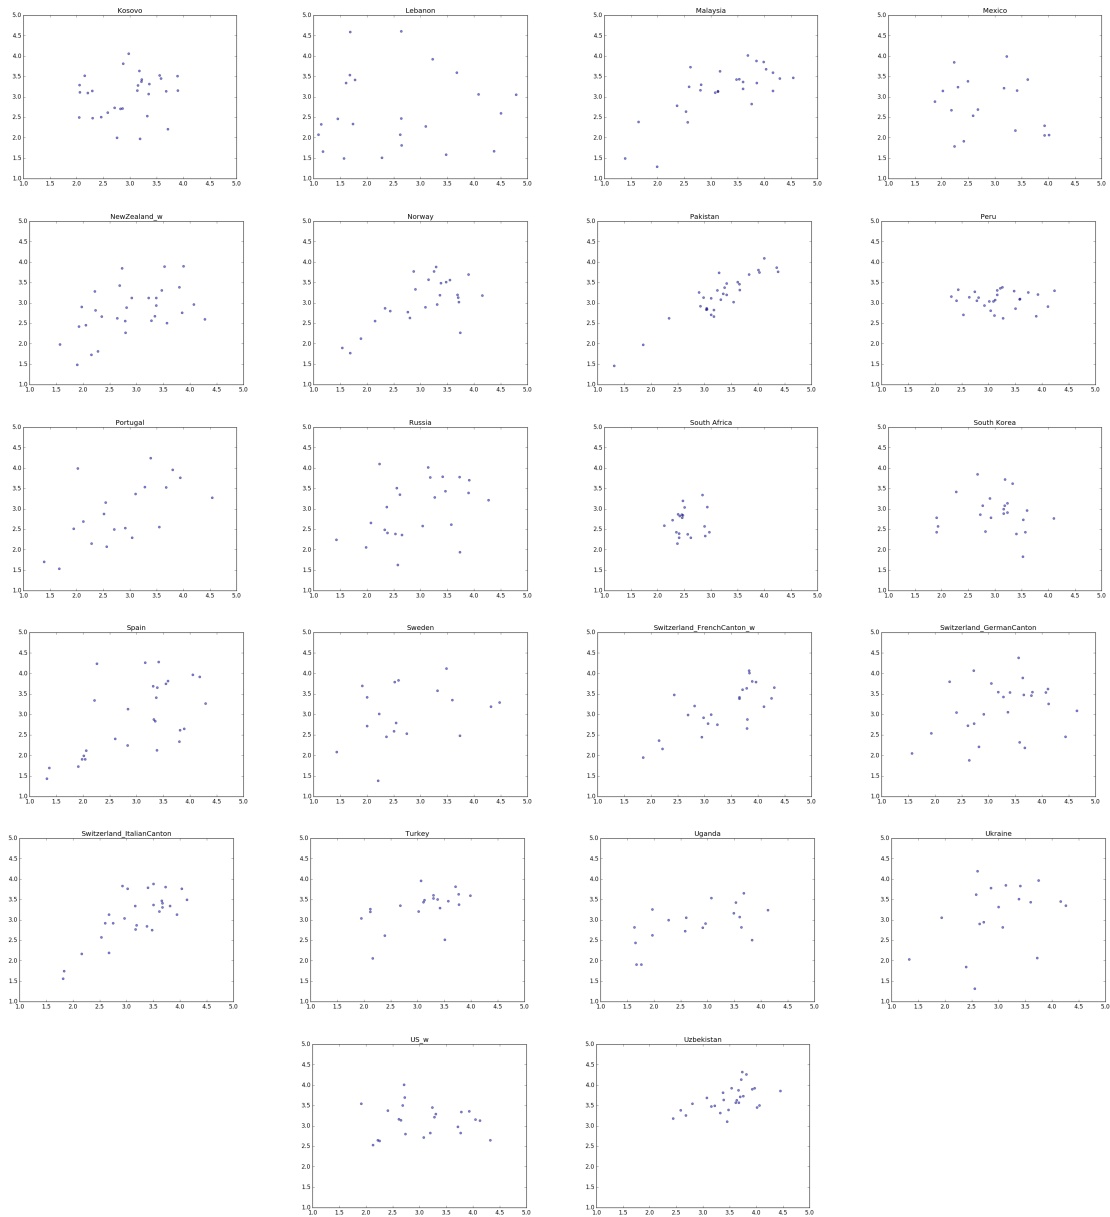

*Note.* Visualization of stereotype content map in each country, warmth on the x-axis and competence on the y-axis, scale range [1,5], continuous. *w* denotes aggregate results from multiple regions (e.g., French, German, and Italian Canton in Switzerland) or multiple samples (e.g., students and adults in Italy) in one country. For sample size, sample feature, group label, clustering analysis, and other detail information in online data file or Durante et al. (2017). Zoom in to see figure titles.

Fig.S 4 – Geographical world heatmap showing inverse relations between diversity and dispersion.

2003 Alesina Diversity Index by Country

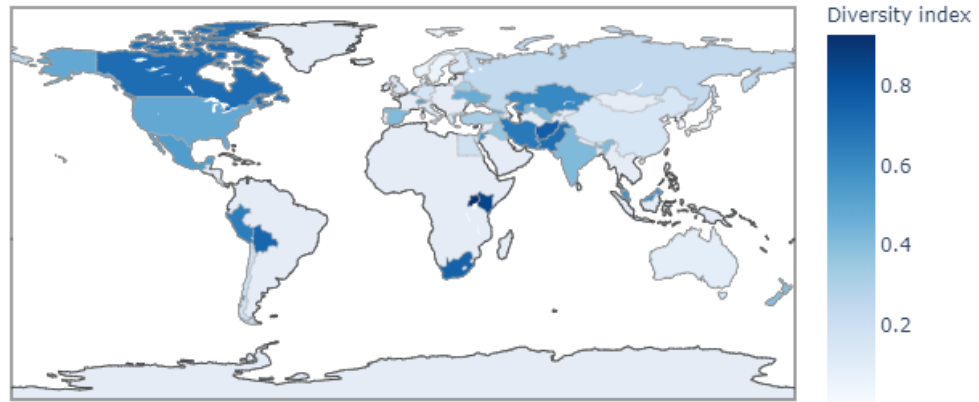

(a) Ethnic diversity in 46 nations and regions

2000-2018 Social Group Stereotype Dispersion by Country

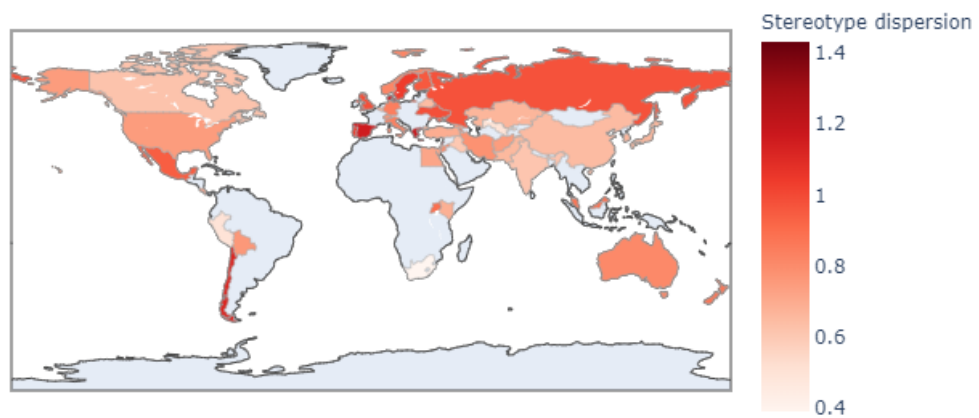

(b) Stereotype dispersion in 46 nations and regions

*Note.* Heatmaps plotting country-level stereotype dispersion and ethnic diversity. The upper figure indicates diversity, with darker blue showing higher diversity. The lower figure indicates stereotype dispersion, with darker red showing larger dispersion. Gray areas indicate no data.

## 2. Study 2 stereotype dispersion and ethnic diversity in 50 states in the US

Table.S 2 – Stereotype dispersion and ethnic diversity in 50 states in the US

| State         | Stereotype dispersion | Ethnic diversity | Perceived diversity | GDP     | GINI   | State          | Stereotype dispersion | Ethnic diversity | Perceived diversity | GDP     | GINI   |
|---------------|-----------------------|------------------|---------------------|---------|--------|----------------|-----------------------|------------------|---------------------|---------|--------|
| Alabama       | 0.238                 | 0.435            | 3.700               | 204201  | 0.4847 | Montana        | 0.413                 | 0.184            | 2.400               | 46478   | 0.4667 |
| Alaska        | 0.169                 | 0.508            | 3.688               | 50542   | 0.4081 | Nebraska       | 0.447                 | 0.182            | 2.846               | 118945  | 0.4477 |
| Arizona       | 0.404                 | 0.276            | 3.700               | 304357  | 0.4713 | Nevada         | 0.471                 | 0.378            | 4.267               | 148216  | 0.4577 |
| Arkansas      | 0.425                 | 0.330            | 3.400               | 121275  | 0.4719 | New Hampshire  | 0.431                 | 0.100            | 2.710               | 77843   | 0.4304 |
| California    | 0.260                 | 0.426            | 4.387               | 2619639 | 0.4899 | New Jersey     | 0.406                 | 0.417            | 4.167               | 576228  | 0.4813 |
| Colorado      | 0.323                 | 0.214            | 3.529               | 323762  | 0.4586 | New Mexico     | 0.218                 | 0.290            | 3.903               | 93242   | 0.4769 |
| Connecticut   | 0.302                 | 0.305            | 3.935               | 257038  | 0.4945 | New York       | 0.199                 | 0.449            | 4.133               | 1500152 | 0.5129 |
| Delaware      | 0.214                 | 0.434            | 3.467               | 70927   | 0.4522 | North Carolina | 0.578                 | 0.428            | 3.633               | 518378  | 0.478  |
| Florida       | 0.300                 | 0.352            | 4.067               | 930375  | 0.4852 | North Dakota   | 0.516                 | 0.176            | 2.550               | 53328   | 0.4533 |
| Georgia       | 0.363                 | 0.501            | 3.800               | 532657  | 0.4813 | Ohio           | 0.494                 | 0.283            | 3.333               | 624372  | 0.468  |
| Hawaii        | 0.150                 | 0.760            | 4.000               | 84904   | 0.442  | Oklahoma       | 0.401                 | 0.407            | 3.300               | 181480  | 0.4645 |
| Idaho         | 0.403                 | 0.113            | 2.767               | 68616   | 0.4503 | Oregon         | 0.415                 | 0.208            | 2.935               | 227032  | 0.4583 |
| Illinois      | 0.415                 | 0.365            | 3.833               | 796906  | 0.481  | Pennsylvania   | 0.497                 | 0.282            | 3.333               | 723962  | 0.4689 |
| Indiana       | 0.565                 | 0.235            | 2.867               | 345207  | 0.4527 | Rhode Island   | 0.502                 | 0.246            | 3.867               | 57507   | 0.4781 |
| Iowa          | 0.529                 | 0.130            | 2.767               | 186200  | 0.4451 | South Carolina | 0.401                 | 0.452            | 3.938               | 210876  | 0.4735 |
| Kansas        | 0.344                 | 0.227            | 3.333               | 154806  | 0.455  | South Dakota   | 0.422                 | 0.238            | 3.300               | 48652   | 0.4495 |
| Kentucky      | 0.522                 | 0.201            | 2.839               | 195527  | 0.4813 | Tennessee      | 0.643                 | 0.337            | 3.387               | 332094  | 0.479  |
| Louisiana     | 0.544                 | 0.485            | 3.938               | 237598  | 0.499  | Texas          | 0.233                 | 0.326            | 3.967               | 1601517 | 0.48   |
| Maine         | 0.519                 | 0.086            | 2.400               | 59475   | 0.4519 | Utah           | 0.476                 | 0.150            | 2.933               | 157404  | 0.4263 |
| Maryland      | 0.503                 | 0.530            | 4.065               | 380805  | 0.4499 | Vermont        | 0.356                 | 0.085            | 2.533               | 31292   | 0.4539 |
| Massachusetts | 0.455                 | 0.279            | 3.879               | 505689  | 0.4786 | Virginia       | 0.332                 | 0.446            | 3.968               | 491221  | 0.4705 |
| Michigan      | 0.508                 | 0.332            | 3.867               | 486874  | 0.4695 | Washington     | 0.305                 | 0.315            | 4.100               | 476934  | 0.4591 |
| Minnesota     | 0.432                 | 0.235            | 3.438               | 338746  | 0.4496 | West Virginia  | 0.544                 | 0.110            | 2.633               | 72569   | 0.4711 |
| Mississippi   | 0.365                 | 0.498            | 3.467               | 109034  | 0.4828 | Wisconsin      | 0.696                 | 0.211            | 3.333               | 314247  | 0.4498 |
| Missouri      | 0.419                 | 0.278            | 3.375               | 297074  | 0.4646 | Wyoming        | 0.400                 | 0.118            | 2.567               | 37925   | 0.436  |

*Note.* See calculations and data source in the main text for each variable. All data collected in July, 2018.



Fig.S 5 – Stereotype dispersion in 50 states

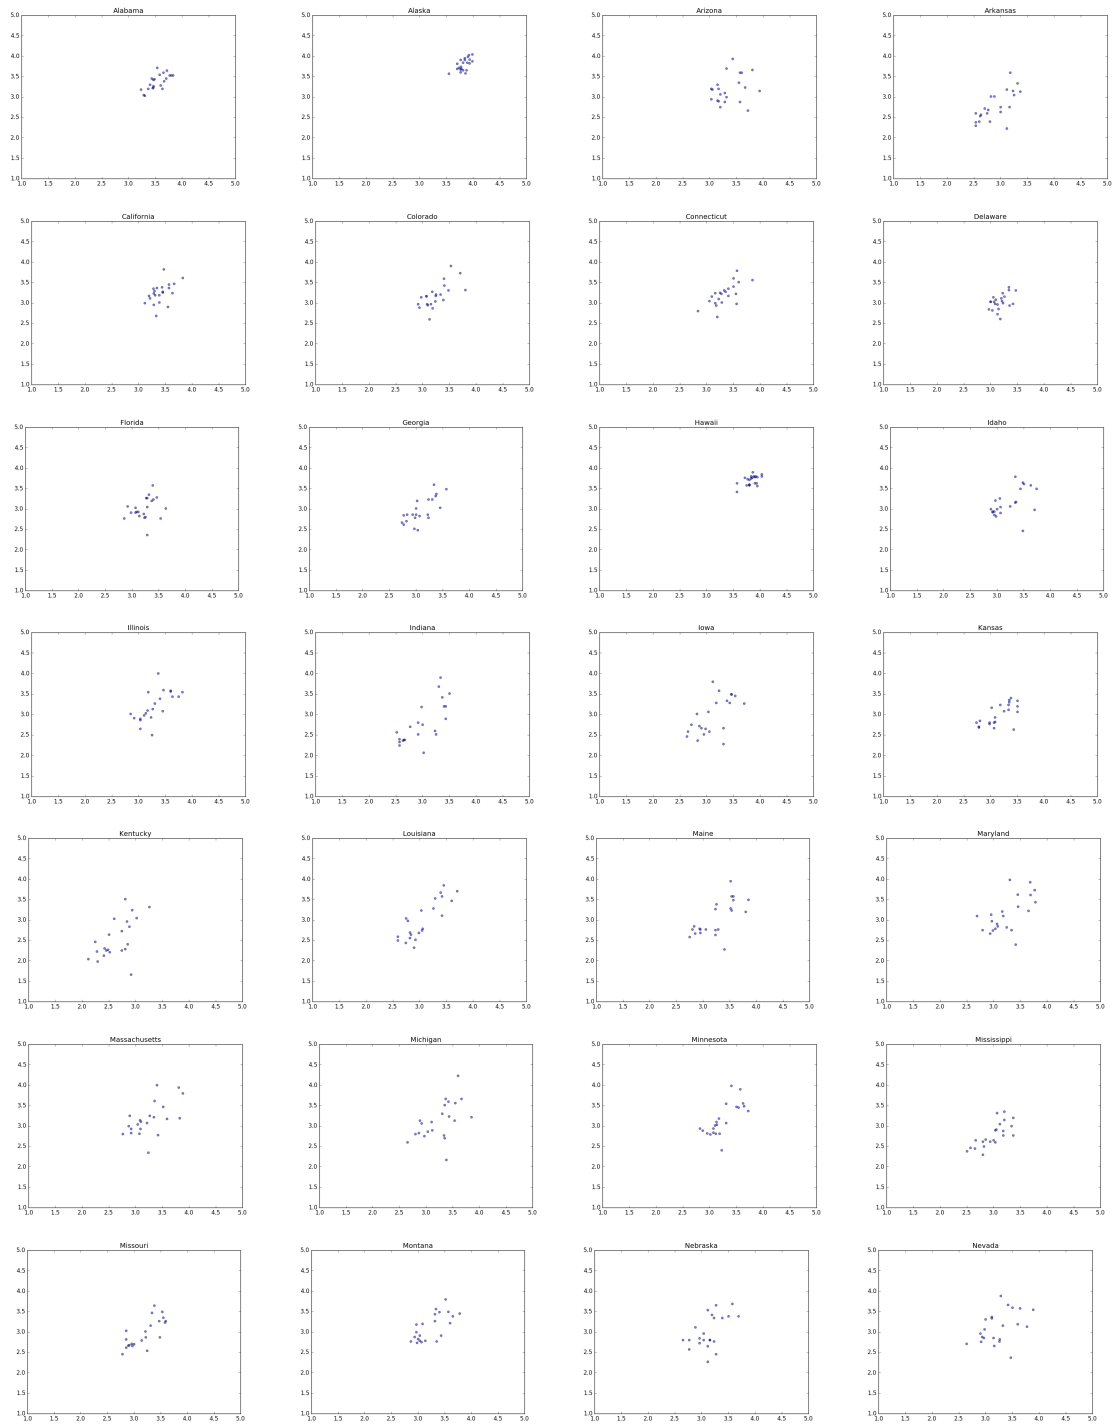

Fig.S 6 – Stereotype dispersion in 50 states cont.

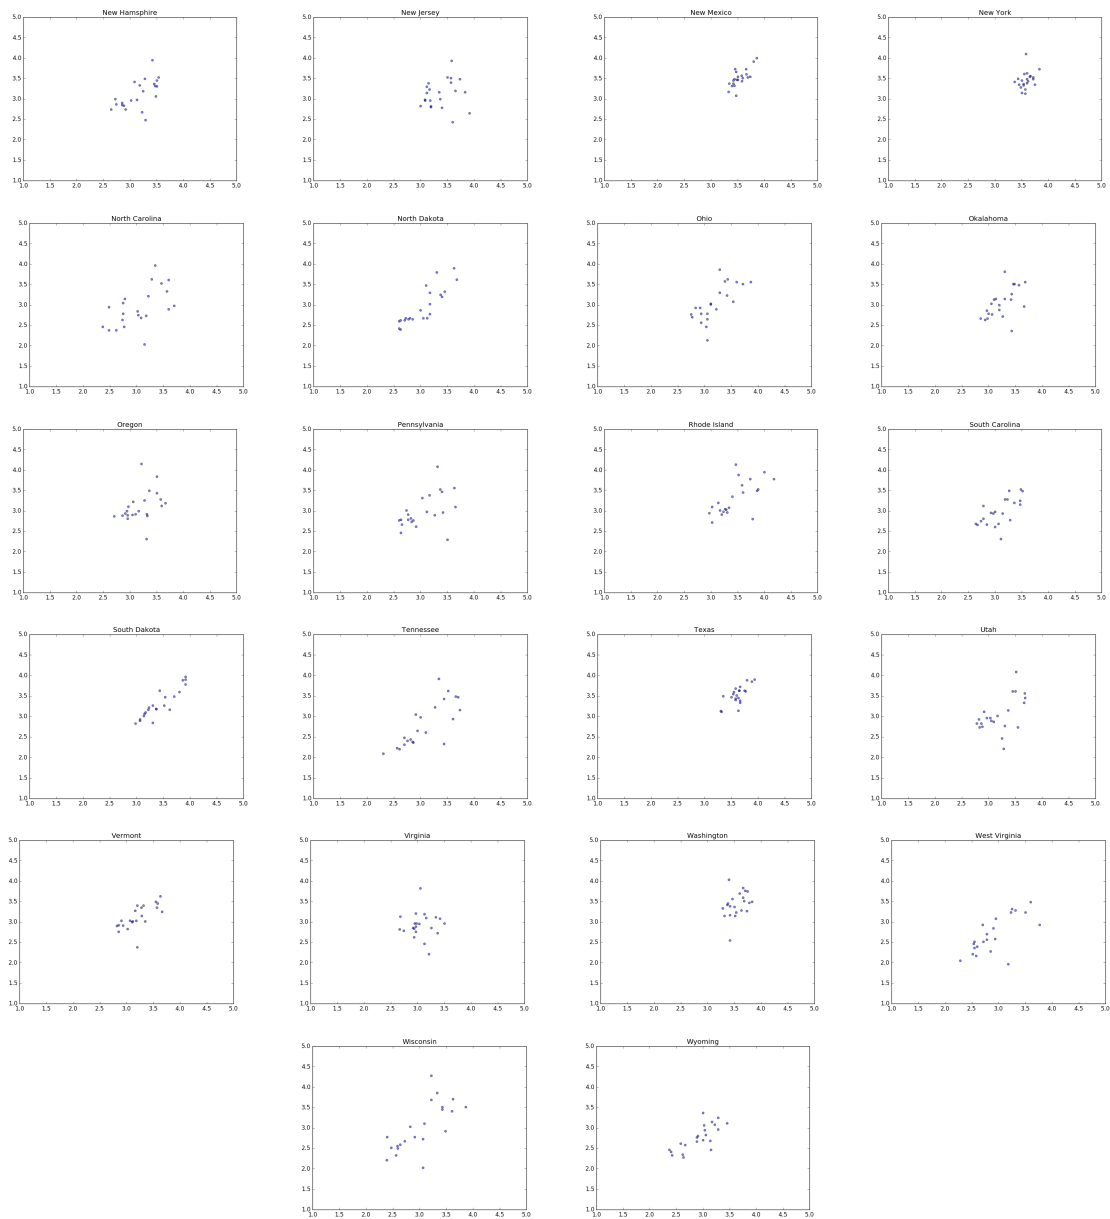

*Note.* Visualization of stereotype content map in each state in the US, warmth on the x-axis and competence on the y-axis, scale range [1,5], continuous. Participants from each state evaluated 20 immigrant groups on perceived warmth and competence, see main text for details (Methods) and group labels for each dot in each state in online data. Zoom in to see figure titles.

Fig.S 7 – Geographical US heatmap showing inverse relations between diversity and dispersion.

2010 Immigrant Diversity by State

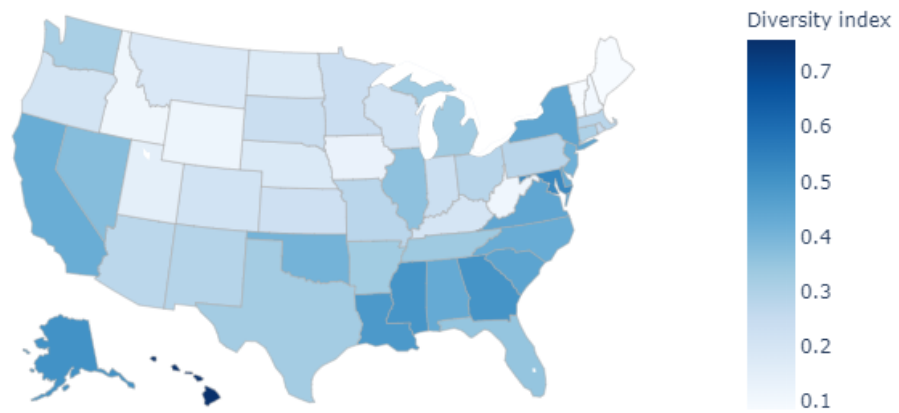

(a) Immigrant diversity in 50 states in the US

2018 Immigrant Stereotype Dispersion by State

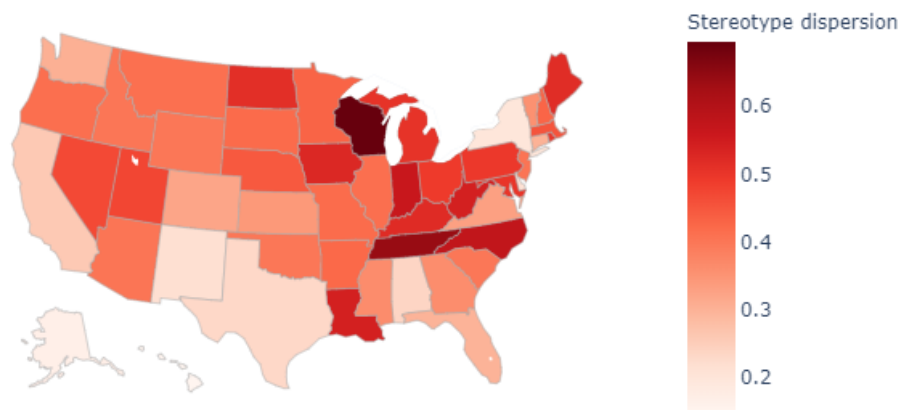

(b) Stereotype dispersion in 50 states in the US

*Note.* Heatmaps plotting state-level stereotype dispersion and ethnic diversity. The upper figure indicates diversity (the most recent available year), with darker blue showing higher diversity. The lower figure indicates stereotype dispersion, with darker red showing larger dispersion.

### 3. Study 2 demographics of online American participants

Table.S 3 – US study participant demographic information

| State         | N  | Gender<br>(% female) | Age<br>(mean) | Years of living | Education level | Social ladder | Household income | Area of residence      | Ancetry immigrant                           |
|---------------|----|----------------------|---------------|-----------------|-----------------|---------------|------------------|------------------------|---------------------------------------------|
| Alabama       | 30 | 0.23                 | 36            | 25              | 4.2             | 6.5           | 4.2              | 47% Big city           | 33% Mexican<br>20% African American         |
| Alaska        | 30 | 0.27                 | 29            | 21              | 4.7             | 6.4           | 4.7              | 40% Big city           | 40% Native American<br>30% African American |
| Arizona       | 30 | 0.37                 | 35            | 21              | 3.8             | 4.9           | 3.8              | 40% Suburbs            | 23% Mexican<br>23% German                   |
| Arkansas      | 30 | 0.47                 | 37            | 23              | 3.4             | 4.7           | 3.4              | 43% Town or small city | 27% Irish<br>20% German                     |
| California    | 30 | 0.4                  | 35            | 27              | 3.9             | 5.1           | 3.9              | 37% Suburbs            | 17% Irish<br>13% German; Italian            |
| Colorado      | 30 | 0.33                 | 33            | 20              | 4.2             | 5.5           | 4.2              | 43% Suburbs            | 40% German                                  |
| Connecticut   | 30 | 0.4                  | 30            | 23              | 4.2             | 5.6           | 4.2              | 43% Town or small city | 23% African American<br>23% Native American |
| Delaware      | 30 | 0.4                  | 31            | 18              | 3.8             | 5.4           | 3.8              | 47% Suburbs            | 33% German<br>20% African American          |
| Florida       | 30 | 0.43                 | 35            | 24              | 4.4             | 5.5           | 4.4              | 53% Suburbs            | 23% British<br>23% African American         |
| Georgia       | 30 | 0.47                 | 33            | 24              | 3.9             | 5.1           | 3.9              | 53% Suburbs            | 17% British<br>17% African American         |
| Hawaii        | 30 | 0.33                 | 31            | 20              | 4.8             | 7.2           | 4.8              | 60% Big city           | 47% Native American<br>43% African American |
| Idaho         | 30 | 0.6                  | 35            | 23              | 3.8             | 4.7           | 3.8              | 40% Suburbs            | 23% German<br>23% British                   |
| Illinois      | 30 | 0.4                  | 36            | 28              | 4.3             | 5.2           | 4.3              | 50% Suburbs            | 30% Native American<br>23% German           |
| Indiana       | 30 | 0.37                 | 33            | 23              | 3.7             | 4.6           | 3.7              | 43% Town or small city | 27% British<br>23% German                   |
| Iowa          | 30 | 0.43                 | 35            | 22              | 3.7             | 4.6           | 3.7              | 43% Town or small city | 43% German                                  |
| Kansas        | 29 | 0.55                 | 36            | 24              | 4.2             | 5.5           | 4.2              | 41% Big city           | 28% German<br>28% Native American           |
| Kentucky      | 30 | 0.57                 | 37            | 29              | 3.1             | 4.2           | 3.1              | 43% Town or small city | 30% German<br>27% British                   |
| Louisiana     | 30 | 0.4                  | 35            | 32              | 3.7             | 5             | 3.7              | 40% Town or small city | 20% German<br>20% African American          |
| Maine         | 30 | 0.5                  | 34            | 24              | 3.7             | 4.6           | 3.7              | 47% Town or small city | 23% British<br>13% German; Italian; Irish   |
| Maryland      | 30 | 0.43                 | 33            | 25              | 3.8             | 5.1           | 3.8              | 47% Suburbs            | 30% German<br>13% South Korean              |
| Massachusetts | 30 | 0.37                 | 34            | 25              | 4.3             | 5.3           | 4.3              | 47% Suburbs            | 23% German<br>17% Other                     |

Table.S 4 – US study participant demographic information cont.

| State          | N  | Gender<br>(% female) | Age<br>(mean) | Years of living | Education level | Social ladder | Household income | Area of residence      | Ancestry immigrant                          |
|----------------|----|----------------------|---------------|-----------------|-----------------|---------------|------------------|------------------------|---------------------------------------------|
| Michigan       | 30 | 0.43                 | 31            | 27              | 3.6             | 4.7           | 3.6              | 47% Suburbs            | 37% German                                  |
| Minnesota      | 30 | 0.43                 | 35            | 30              | 3.7             | 4.3           | 3.7              | 43% Suburbs            | 53% German                                  |
| Mississippi    | 30 | 0.67                 | 33            | 22              | 4               | 5             | 4                | 50% Town or small city | 23% British<br>13% African; Native American |
| Missouri       | 30 | 0.43                 | 34            | 28              | 3.6             | 5             | 3.6              | 37% Big city           | 37% German<br>20% Native American           |
| Montana        | 29 | 0.45                 | 35            | 14              | 4.3             | 5.2           | 4.3              | 53% Town or small city | 33% German<br>17% British                   |
| Nebraska       | 13 | 0.54                 | 31            | 21              | 4.2             | 4.5           | 4.2              | 46% Big city           | 69% German                                  |
| Nevada         | 30 | 0.37                 | 36            | 14              | 3.5             | 4.3           | 3.5              | 67% Big city           | 33% German                                  |
| New Hampshire  | 30 | 0.37                 | 36            | 26              | 4               | 5.3           | 4                | 40% Town or small city | 33% British<br>27% Italian                  |
| New Jersey     | 30 | 0.3                  | 38            | 31              | 3.7             | 5.3           | 3.7              | 47% Suburbs            | 17% Native American                         |
| New Mexico     | 30 | 0.27                 | 35            | 24              | 4.7             | 6.1           | 4.7              | 63% Big city           | 43% Mexican                                 |
| New York       | 30 | 0.3                  | 32            | 24              | 4.7             | 6.5           | 4.7              | 57% Big city           | 23% African American<br>20% Native American |
| North Carolina | 30 | 0.47                 | 40            | 22              | 3.4             | 4.5           | 3.4              | 37% Suburbs            | 27% British<br>20% German                   |
| North Dakota   | 20 | 0.4                  | 35            | 18              | 4               | 4.9           | 4                | 55% Town or small city | 40% German                                  |
| Ohio           | 30 | 0.37                 | 31            | 24              | 3.8             | 4.4           | 3.8              | 53% Suburbs            | 33% German                                  |
| Oklahoma       | 30 | 0.47                 | 36            | 27              | 3.6             | 4.3           | 3.6              | 33% Suburbs            | 30% British<br>23% German                   |
| Oregon         | 30 | 0.6                  | 40            | 21              | 3.5             | 3.7           | 3.5              | 43% Town or small city | 37% German<br>20% British                   |
| Pennsylvania   | 30 | 0.43                 | 33            | 26              | 3.5             | 4.3           | 3.5              | 37% Town or small city | 40% German                                  |
| Rhode Island   | 30 | 0.33                 | 36            | 23              | 3.6             | 4.8           | 3.6              | 70% Town or small city | 23% Irish<br>20% Italian                    |
| South Carolina | 30 | 0.53                 | 35            | 23              | 4.3             | 4.7           | 4.3              | 40% Town or small city | 37% German                                  |
| South Dakota   | 30 | 0.37                 | 32            | 20              | 4.2             | 6.2           | 4.2              | 43% Town or small city | 33% African American<br>27% German          |
| Tennessee      | 30 | 0.6                  | 39            | 28              | 3.5             | 4.4           | 3.5              | 43% Suburbs            | 37% German<br>23% British                   |
| Texas          | 30 | 0.27                 | 34            | 25              | 4.2             | 6             | 4.2              | 47% Big city           | 33% Native American                         |
| Utah           | 30 | 0.37                 | 37            | 23              | 3.9             | 4.4           | 3.9              | 60% Suburbs            | 30% German<br>27% British                   |
| Vermont        | 30 | 0.43                 | 33            | 20              | 4.4             | 4.8           | 4.4              | 37% Town or small city | 27% German<br>17% British; Italian          |
| Virginia       | 30 | 0.57                 | 33            | 23              | 3.9             | 5             | 3.9              | 43% Suburbs            | 23% German<br>13% African American          |
| Washington     | 30 | 0.53                 | 34            | 21              | 3.6             | 5             | 3.6              | 47% Big city           | 23% German                                  |
| West Virginia  | 30 | 0.33                 | 34            | 21              | 4.3             | 5.6           | 4.3              | 47% Town or small city | 27% German<br>27% African American          |
| Wisconsin      | 30 | 0.53                 | 35            | 29              | 3.6             | 4.7           | 3.6              | 37% Town or small city | 70% German                                  |
| Wyoming        | 30 | 0.33                 | 34            | 23              | 3.9             | 5.4           | 3.9              | 53% Town or small city | 33% British                                 |

Note. See variable manipulations in the main text Methods section.

#### 4. Study 2 stereotype dispersion by ethnic group

An alternative explanation for less stereotype dispersion in diverse states is group identity. In more diverse states, we could have drawn more minority group participants, whereas in less diverse states, we might have collected more majority group participants. Therefore, both diversity and group identity may associate with stereotype dispersion. Table below provides descriptive statistics on stereotype dispersion ratings by immigrant group. We did not observe clear patterns. Spearman's rank correlation coefficient,  $\rho(48) = -.051, p = .816$ , also showed null relationship between group membership and stereotype dispersion. Moreover, in the main model, we observed the effect conditional on group membership. Accordingly, we rule out this explanation.

Table.S 5 – Stereotype dispersion by immigrant group.

| Ancestry immigrant   | Stereotype dispersion | N   |
|----------------------|-----------------------|-----|
| Mexican              | 0.7782 (.393)         | 71  |
| German               | 0.9136 (.363)         | 369 |
| British              | 0.9093 (.363)         | 215 |
| Italian              | 0.9719 (.430)         | 87  |
| Canadian             | 0.9150 (.350)         | 34  |
| Irish                | 0.9779 (.324)         | 115 |
| Russian              | 0.8541 (.391)         | 14  |
| Filipino             | 0.8628 (.614)         | 9   |
| Chinese              | 0.8588 (.354)         | 20  |
| Australian           | 0.8255 (.302)         | 2   |
| Indian               | 0.6940 (.323)         | 9   |
| Hungarian            | 0.9975 (.218)         | 5   |
| Cuban                | 1.1028 (.339)         | 3   |
| Dominican Republican | 0.7831 (.739)         | 6   |
| Swedish              | 1.0295 (.422)         | 16  |
| South Korean         | 1.0847 (.629)         | 19  |
| Vietnamese           | 0.8365 (.520)         | 8   |
| Polish               | 1.0338 (.422)         | 27  |
| African              | 0.8514 (.309)         | 17  |
| African American     | 0.6875 (.338)         | 144 |
| Native American      | 0.7211 (.359)         | 162 |
| Jew                  | 1.0680 (.415)         | 12  |
| Other                | 0.8439 (.350)         | 107 |

*Note.* For each participant, we have their self-report immigrant ancestry data. If multiple groups were selected, we used their first selected ancestor as the proxy for their own ethnicity. *N* therefore denotes participants' self-report ethnicity. For stereotype dispersion, we calculated average and standard error within each ethnicity.

Here we provide more visual inspections. Using data from study 2, we plotted stereotype dispersion by immigrant group, and the relationship between perceived diversity and stereotype dispersion by immigrant group.

Fig.S 8 – Majority-minority dynamics: Stereotype dispersion by immigrant group in Study 2

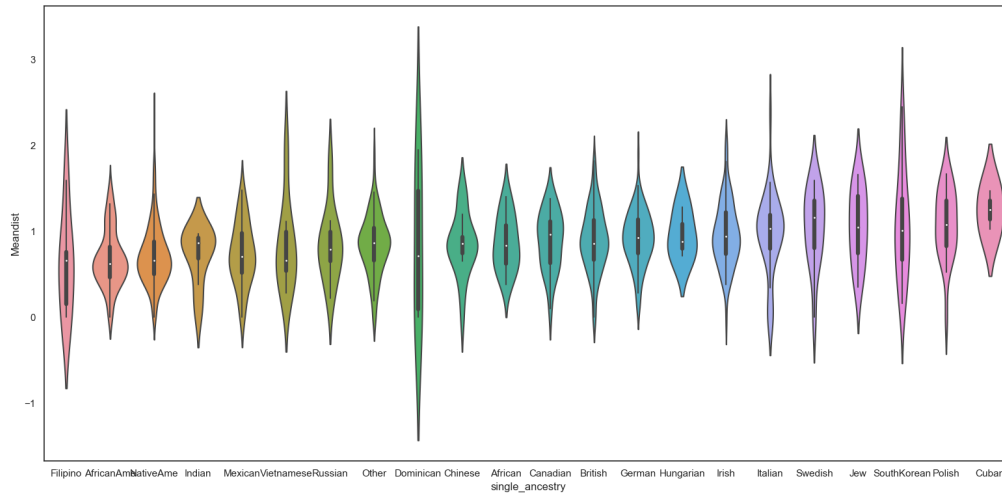

(a) Stereotype dispersion by immigrant group

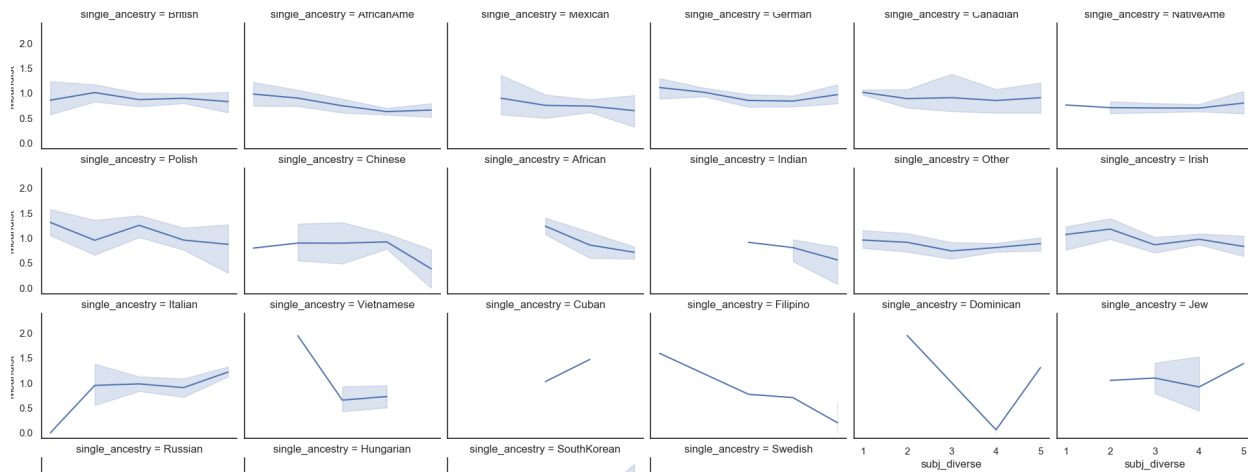

(b) Relation between perceived diversity and stereotype dispersion by immigrant group



Here we provide visual inspections using data from study 3. We plotted stereotype dispersion by race group, and the relationship between perceived diversity and stereotype dispersion by race group.

Fig.S 9 – Majority-minority dynamics: Stereotype dispersion by race group in Study 3

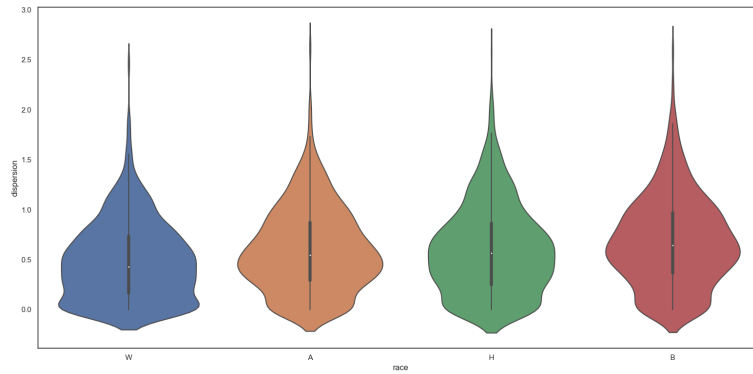

(a) Stereotype dispersion by race in high school

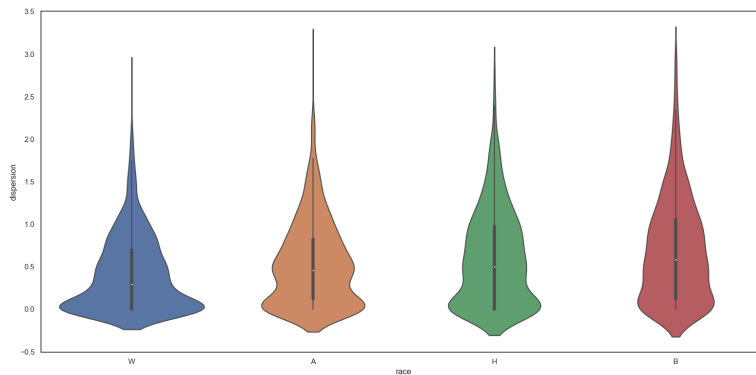

(b) Stereotype dispersion by race in college

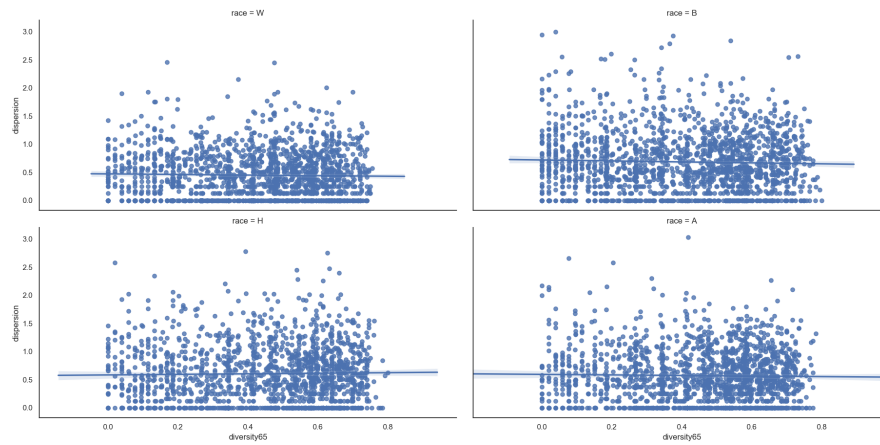

(c) Relation between perceived diversity and stereotype dispersion by race, high school and college

## 5. Study 2 multilevel regression and state random effects

Below we show the main model output for Study 2. GDP is denoted in unit  $10^7$ . We included ancestry variable in the actual model, but for space concern, omit reporting here, see online data for details. Area of living is tested as continuous and discrete variable, results remain unchanged. Continuous variables are centered and discrete variables are factorized.

Therefore, state diversity effect should be interpreted as: for participants living in states with same levels of inequality (.465) and wealth (37305), for one-unit increase in state diversity, we expect to see .282 decrease in stereotype dispersion.

Likewise, individual perceived diversity should be interpreted as: within participants who are the same gender (female), with similar age (34yrs), similar socio-economic backgrounds (some college degree, social ladder 5 out of 9, annual income 30k to 50k), live in the same type of areas (suburbs of a big city or small city), have similar frequency of contact with other groups (3.81 out of 5), and within the same ancestry immigrant groups (out of 20 groups), those who perceived more diversity showed less stereotype dispersion; 1-unit increase in micro-diversity corresponds to .034 to .031 decrease in stereotype dispersion.

On Hawaii. Hawaii appears to be an outlier in terms of levels of diversity. We therefore examined the regression model excluding Hawaii. The state-level fixed effect holds without Hawaii ( $b = -.246$ , 95% CI [-.470, -.022],  $p = .037$ ), and the individual-level fixed effect also holds without Hawaii ( $b = -.031$ , 95% CI [-.052, -.010],  $p = .004$ ). Comparing to the whole dataset, the magnitude decreased slightly on state fixed effects, but almost no change on individual effects.

Table.S 6 – Mixed-effects multiple regression

|                        | Model 1: state diversity | Model 2: perceived diversity | Model 3: both         |
|------------------------|--------------------------|------------------------------|-----------------------|
| Intercept              | .870***(.014)            | 0.838***(.045)               | .839***(.045)         |
| Fixed effects          |                          |                              |                       |
| Model 1 variables      |                          |                              |                       |
| state diversity        | <i>-.282**(.102)</i>     |                              | <i>-.046 (.092)</i>   |
|                        | <i>-.040**(.014)</i>     |                              | <i>-.006 (.012)</i>   |
| state gini             | 1.612†(.819)             |                              | 1.329†(.687)          |
| state gdp              | <i>-.821*(.393)</i>      |                              | <i>-.716*(.285)</i>   |
| Model 2 variables      |                          |                              |                       |
| perceived diversity    |                          | <i>-.034***(.010)</i>        | <i>-.031**(.011)</i>  |
|                        |                          | <i>-.037***(.011)</i>        | <i>-.034**(.012)</i>  |
| age                    |                          | <i>-.000 (.001)</i>          | <i>-.000 (.001)</i>   |
| gender                 |                          | <i>.079***(.020)</i>         | <i>.078***(.200)</i>  |
| education              |                          | <i>-.010 (.009)</i>          | <i>-.010 (.009)</i>   |
| social ladder          |                          | <i>-.033***(.007)</i>        | <i>-.033***(.007)</i> |
| income                 |                          | <i>.025**(.008)</i>          | <i>.025**(.008)</i>   |
| years living           |                          | <i>-.000 (.000)</i>          | <i>-.000 (.000)</i>   |
| living area            |                          | <i>.008 (.010)</i>           | <i>.006 (.010)</i>    |
| contact frequency      |                          | <i>.003 (.010)</i>           | <i>.002 (.010)</i>    |
| Random effects         |                          |                              |                       |
| intercept              | .004 (.066)              | .002 (.049)                  | .002 (.042)           |
| residual               | .140 (.375)              | .131 (.362)                  | .131 (.362)           |
| Number of observations |                          |                              |                       |
| state-level            | 50                       | 50                           | 50                    |
| individual-level       | 1471                     | 1458                         | 1458                  |

Note. Statistical significance level: †  $p < .10$ , \*  $p < .05$ , \*\*  $p < .01$ , \*\*\*  $p < .001$ . Given state and perceived diversity are on different scales, we also standardized these independent variables. Italicized texts in state diversity and perceived diversity are standardized results, for comparison purposes.

Fig.S 10 – Individual perceived diversity predicts individual stereotype dispersion, random effects.

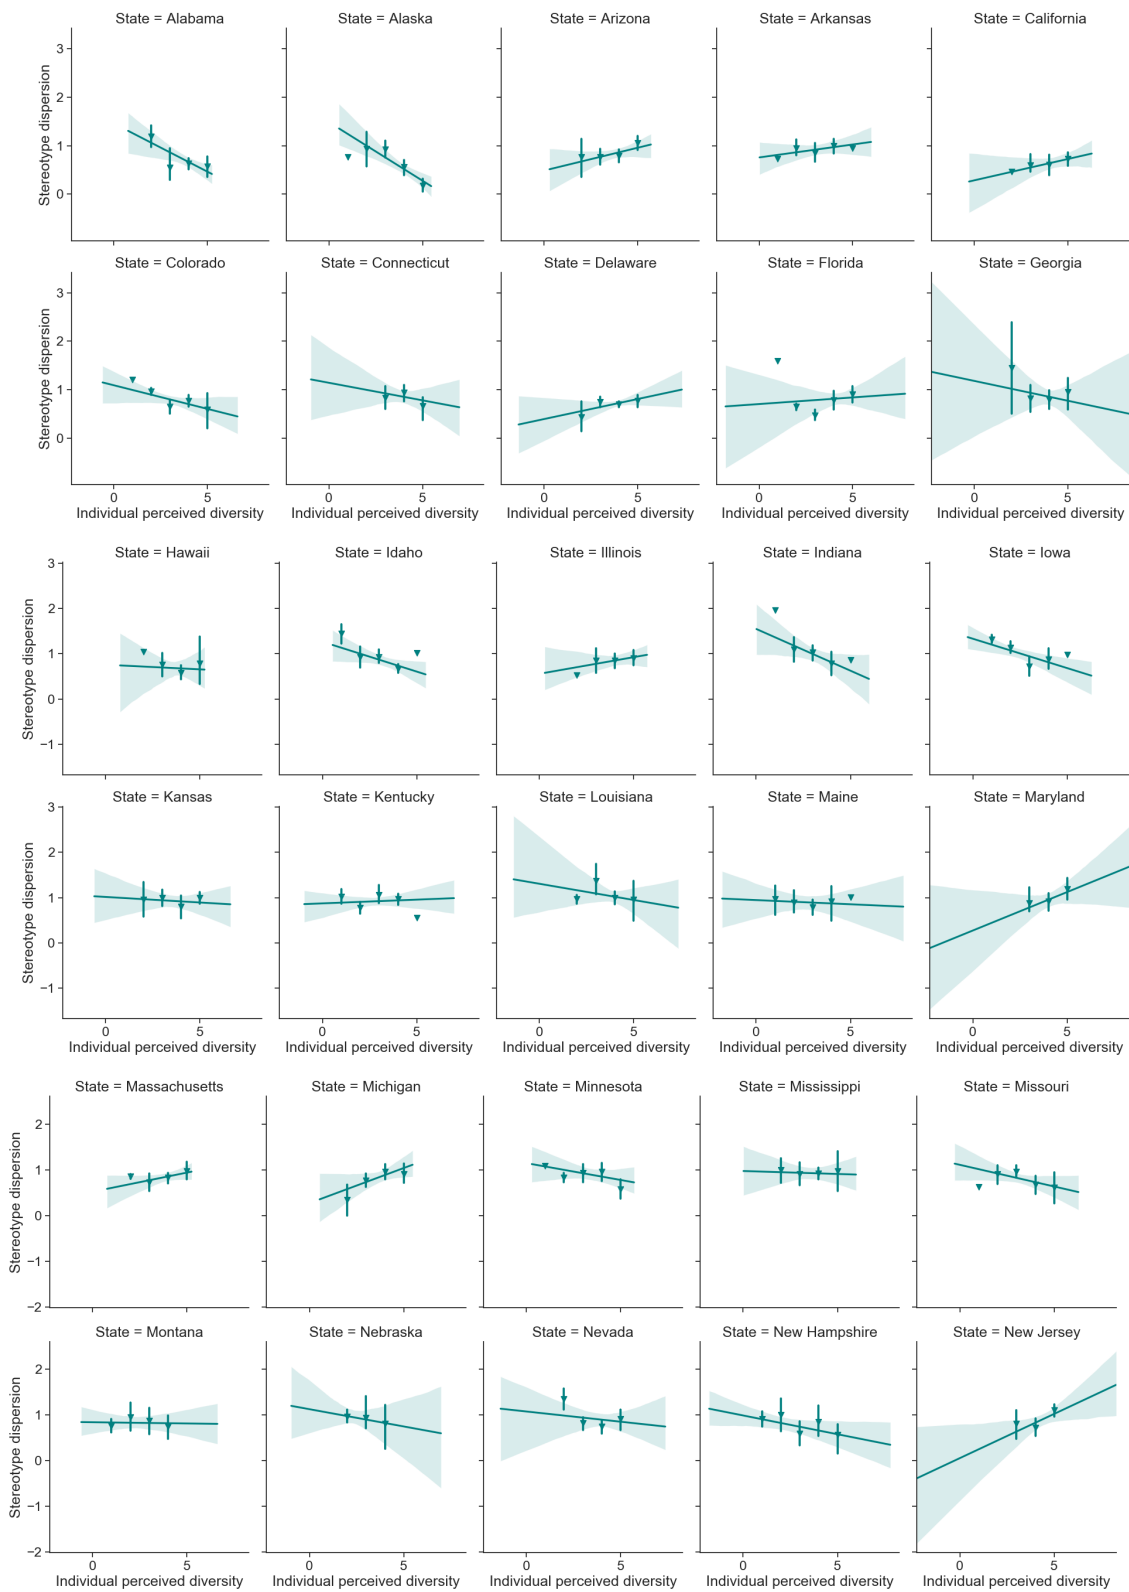

Fig.S 11 – Individual perceived diversity predicts individual stereotype dispersion, random effects contd.

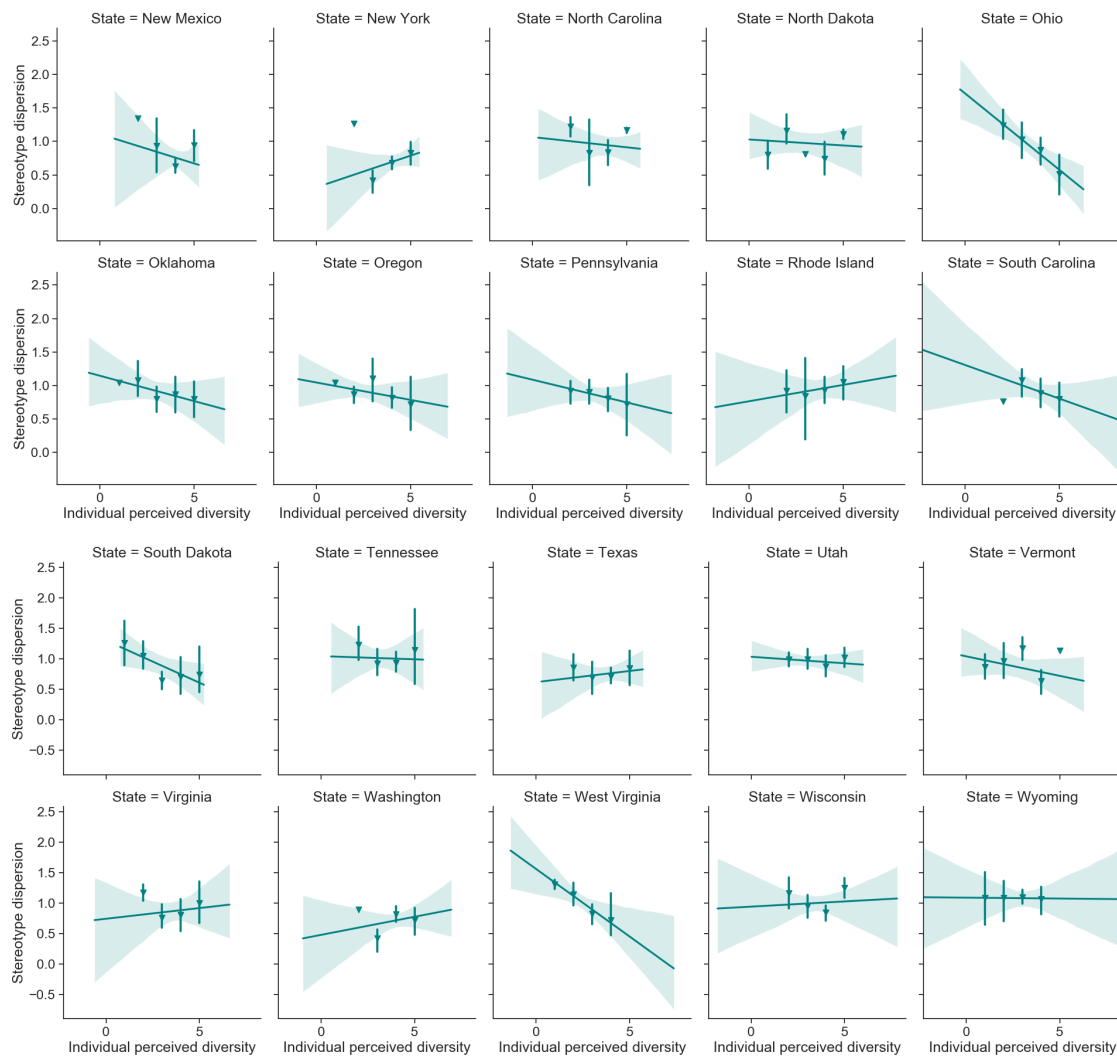

*Note.* Visualization of perceived diversity effects on individual stereotype dispersion, per state. Interpret with caution, more descriptive than inferential, given unstable estimates from small sample size per state.

## 6. Study 2 mediation analysis

**Mediation SI-1** Mediation effects of perceived diversity between contextual diversity and stereotype dispersion. First, LSEM mediation analysis (Kenny & Baron, 1986) indicates that perceived diversity statistically accounted for the observed tendency for individuals who live in diverse states display less stereotype dispersion. Individuals in diverse states high tendency to report less stereotype dispersion ( $b = -.287, 95\%CI[-.484, -.089]$ ) was reduced ( $b = -.164, 95\%CI[-.367, .037]$ ) after accounting for their perceived diversity. See path figure below.

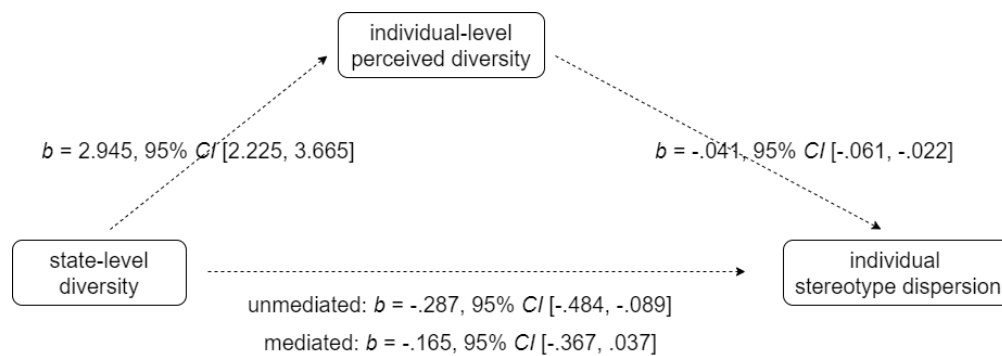

**Mediation SI-2** Next, Causal Mediation Analysis (Imai, 2010) using R mediation package (Tingley, et al., 2017), under sequential ignorability assumption, we found that on average the contextual diversity decreases participants stereotype dispersion by .02 (with a 95% confidence interval of [-.03, -.01]) because of heightened individual-level perceived diversity. Because the total causal effect of contextual diversity was -.05 ([-.10, .00]) and the direct effect was -.04 ([-.09, .01]), we conclude that about 28% of the total effect was mediated through the perceived diversity mechanism.

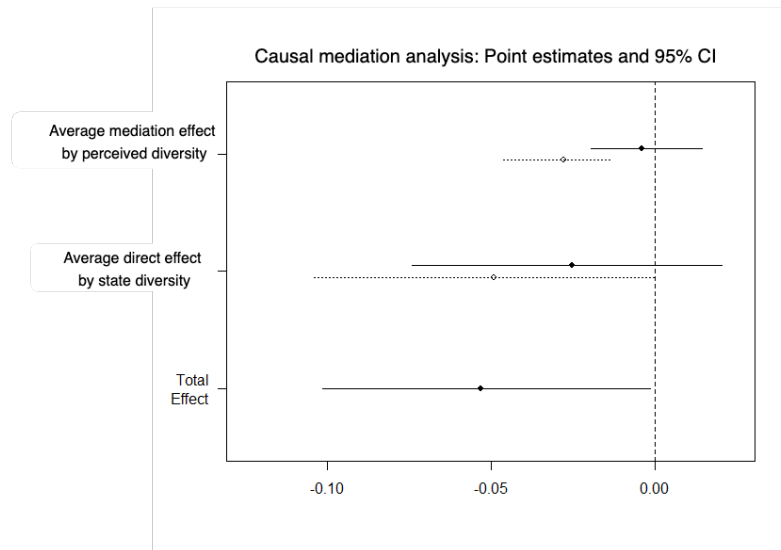

More on the computation: In this analysis, we examined whether state-level diversity influences individual-level perceived diversity which in turn influences stereotype dispersion.

Specifically, to estimate the average causal mediation effects, we first fitted regression models for the mediator and the outcome. The mediator (individual-level subjective diversity) is modeled as a function of the treatment (state-level macro diversity; dichotomized into 0 or 1 with 0 indicates low diversity group and 1 indicates high diversity group) and any relevant pretreatment covariates (i.e., age, gender, socio-economic status, and living area). The outcome is modeled as a function of the mediator, the treatment, and the pretreatment covariates.

Based on the mediator model, we then generated two sets of predictions for the mediator, one under the treatment (predicted values of perceived diversity in high diversity states) and the other under the control (predicted values of perceived diversity in low diversity states).

Next, the outcome model is used to make potential outcome predictions. For example, suppose we are interested in estimating the average causal mediation effects under the treatment (high diversity states). First, the outcome (stereotype dispersion) is predicted under the treatment using the value of the mediator predicted in the treatment condition (predicted perceived diversity under high diversity states). Second, the outcome is predicted under the treatment condition but now uses the mediator prediction from the control condition (predicted perceived diversity if they were assigned in low diversity states, which is counterfactual).

The average treatment effect is then computed as the average difference between the outcome predictions using the two different values of the mediators. In other words, this would correspond to the average difference in stereotype dispersion from fixing the treatment status but changing the level of perceived diversity between the level predicted after being exposed to high versus low diversity states. Then, we used nonparametric bootstrap with 100 samples to compute statistical uncertainty of the effect.

## 7. Study 3 derivation of diff-in-diff estimator

$$y_{i,t} = \alpha + \beta_1 T_t + \beta_2 D_{i,t} + \beta_3 (T_t * D_{i,t}) + \gamma X_{i,t} + \varepsilon_{i,t} \quad (1)$$

$T_t$  is binary, 1 if college; 0 if high school.

$D_{i,t}$  is continuous  $\in [0,3]$ , perceived diversity.

$d_{i,1}$  if in college;  $d_{i,0}$  if in high school.

When  $T_t = 0, D_{i,0} = d_{i,0}$ , the stereotype dispersion of student  $i$  when in high school with  $d_{i,0}$  perceived diversity, is:

$$y_{i,0} = \alpha + \beta_2 d_{i,0} + \gamma X_{i,t} + \varepsilon_{i,t} \quad (2)$$

When  $T_t = 0, D_{i,1} = d_{i,1}$ , the stereotype dispersion of student  $i$  when in high school with  $d_{i,1}$  perceived diversity, is:

$$y_{i,0} = \alpha + \beta_2 d_{i,1} + \gamma X_{i,t} + \varepsilon_{i,t} \quad (3)$$

When  $T_t = 1, D_{i,0} = d_{i,0}$ , the stereotype dispersion of student  $i$  when in college with  $d_{i,0}$  perceived diversity, is:

$$y_{i,1} = \alpha + \beta_1 + \beta_2 d_{i,0} + \beta_3 d_{i,0} + \gamma X_{i,t} + \varepsilon_{i,t} \quad (4)$$

When  $T_t = 1, D_{i,1} = d_{i,1}$ , the stereotype dispersion of student  $i$  when in high school with  $d_{i,0}$  perceived diversity, is:

$$y_{i,1} = \alpha + \beta_1 + \beta_2 d_{i,1} + \beta_3 d_{i,1} + \gamma X_{i,t} + \varepsilon_{i,t} \quad (5)$$

The difference between Eq (4) and Eq (2) represents time trends, for students who have same levels of perceived diversity ( $d_{i,0}$ ), how likely are the stereotype dispersion have been changed due to the fact that they went to college, which is  $\beta_1 + \beta_3 d_{i,0}$ .

Likewise, the difference between Eq (5) and Eq (3) represents time trends for students with perceived diversity ( $d_{i,1}$ ), which is  $\beta_1 + \beta_3 d_{i,1}$ .

To attenuate individual or group baseline difference, by subtracting the above two terms gives us  $\beta_3(d_{i,1} - d_{i,0})$ . This is the change in stereotype dispersion of student  $i$  when he or she has changed perceived diversity from  $d_0$  to  $d_1$ .

The coefficient of  $\beta_3$  is thus our main quantity of interest, the difference-in-difference estimator.



## 8. Study 3 robustness check

Table.S 7 – diff-in-diff, robust check with multiple pre-high school diversity (standardized results are italicized)

|                                           | high school (1)       | high school (2)       | 3-block at 13 (1)    | 3-block at 13 (2)   | high school at 13 (1) | high school at 13 (2) |
|-------------------------------------------|-----------------------|-----------------------|----------------------|---------------------|-----------------------|-----------------------|
| Intercept (female, average income, Asian) | .565*** (.021)        | .556*** (.025)        | .583*** (.017)       | .580*** (.020)      | .586*** (.020)        | .581 (.023)           |
| Fixed effects                             |                       |                       |                      |                     |                       |                       |
| Step 1 variables                          |                       |                       |                      |                     |                       |                       |
| perceived diversity : college             | <i>-.155** (.054)</i> | <i>-.116** (.055)</i> | <i>-.111* (.052)</i> | <i>-.045 (.053)</i> | <i>-.110* (.052)</i>  | <i>-.062 (.054)</i>   |
|                                           | <i>-.032* (.011)</i>  | <i>-.024* (.011)</i>  | <i>-.025* (.012)</i> | <i>-.001 (.403)</i> | <i>-.023* (.011)</i>  | <i>-.013 (.246)</i>   |
| perceived diversity                       | .029 (.037)           | .012 (.037)           | -.020 (.033)         | .067* (.034)        | -.022 (.034)          | -.048 (.035)          |
| college                                   | .035 (.025)           | .017 (.025)           | .018 (.021)          | -.004 (.022)        | .015 (.023)           | -.007 (.024)          |
| Step 2 variables                          |                       |                       |                      |                     |                       |                       |
| male                                      | .065*** (.014)        | .065*** (.014)        |                      | -.028** (.011)      |                       | .065*** (.014)        |
| income                                    |                       | -.014*** (.004)       |                      | -.000 (.001)        |                       | -.014*** (.004)       |
| race Black                                |                       | .094*** (.020)        |                      | .093*** (.020)      |                       | .094*** (.020)        |
| race Hispanic                             |                       | .021 (.020)           |                      | .020 (.020)         |                       | .020 (.020)           |
| race White                                |                       | -.012*** (.020)       |                      | -.124*** (.020)     |                       | -.121*** (.020)       |
| Random effects                            |                       |                       |                      |                     |                       |                       |
| high school state intercept               | .004 (.061)           | .002 (.041)           | .004 (.061)          | .002 (.042)         | .004 (.061)           | .002 (.042)           |
| subject intercept                         | .096 (.310)           | .089 (.298)           | .096 (.310)          | .089 (.298)         | .096 (.310)           | .089 (.298)           |
| residual                                  | .134 (.367)           | .136 (.369)           | .135 (.367)          | .136 (.369)         | .135 (.367)           | .136 (.367)           |
| Number of observations                    |                       |                       |                      |                     |                       |                       |
| state-level                               | 49                    | 49                    | 49                   | 49                  | 49                    | 49                    |
| subject-level                             | 3735                  | 3586                  | 3730                 | 3581                | 3732                  | 3583                  |
| number of obs                             | 6463                  | 6233                  | 6451                 | 6222                | 6445                  | 6216                  |

Table.S 8 – diff-in-diff, robust check with multiple pre-high school diversity, cont.

|                                           | high school (1) | high school (2) | 3-block at 6 (1) | 3-block at 6 (2) | first-grade (1) | first-grade (2) |
|-------------------------------------------|-----------------|-----------------|------------------|------------------|-----------------|-----------------|
| Intercept (female, average income, Asian) | .565*** (.021)  | .556*** (.025)  | .589*** (.016)   | .583*** (.020)   | .588*** (.017)  | .578*** (.021)  |
| Fixed effects                             |                 |                 |                  |                  |                 |                 |
| Step 1 variables                          |                 |                 |                  |                  |                 |                 |
| perceived diversity : college             | -.155** (.054)  | -.116** (.055)  | -.062† (.054)    | -.026 (.053)     | -.102* (.052)   | -.060 (.052)    |
| perceived diversity                       | -.032* (.011)   | -.024* (.011)   | -.013† (.246)    | -.006 (.620)     | -.023* (.011)   | -.013 (.253)    |
| college                                   | .029 (.037)     | .012 (.037)     | -.041 (.033)     | -.084* (.034)    | -.030 (.033)    | -.050 (.033)    |
| Step 2 variables                          |                 |                 |                  |                  |                 |                 |
| male                                      | .035 (.025)     | .017 (.025)     | .012 (.021)      | -.008 (.021)     | .014 (.022)     | -.003 (.022)    |
| income                                    | .065*** (.014)  | .065*** (.014)  | .066** (.014)    | .066** (.014)    | .066*** (.014)  | .066*** (.014)  |
| race Black                                | -.014*** (.004) | -.014*** (.004) | -.014*** (.004)  | -.014*** (.004)  | -.014*** (.004) | -.014*** (.004) |
| race Hispanic                             | .094*** (.020)  | .094*** (.020)  | .095*** (.020)   | .095*** (.020)   | .094*** (.020)  | .094*** (.020)  |
| race White                                | .021 (.020)     | .021 (.020)     | .021 (.020)      | .021 (.020)      | .021 (.020)     | .021 (.020)     |
| Random effects                            |                 |                 |                  |                  |                 |                 |
| high school state intercept               | -.012*** (.020) | -.012*** (.020) | -.123*** (.020)  | -.123*** (.020)  | -.121*** (.020) | -.121*** (.020) |
| subject intercept                         | .004 (.061)     | .002 (.041)     | .003 (.059)      | .002 (.040)      | .004 (.060)     | .002 (.041)     |
| residual                                  | .096 (.310)     | .089 (.298)     | .097 (.311)      | .089 (.299)      | .097 (.311)     | .090 (.300)     |
| Number of observations                    | .134 (.367)     | .136 (.369)     | .135 (.367)      | .136 (.369)      | .134 (.366)     | .135 (.368)     |
| state-level                               | 49              | 49              | 49               | 49               | 49              | 49              |
| subject-level                             | 3735            | 3586            | 3721             | 3574             | 3724            | 3575            |
| number of obs                             | 6463            | 6233            | 6432             | 6204             | 6412            | 6183            |

Table.S 9 – diff-in-diff estimations with inverse probability weighted and unweighted data.

|                                           | unweighted     |                 | weighted       |                 |
|-------------------------------------------|----------------|-----------------|----------------|-----------------|
| Intercept (female, average income, Asian) | .565*** (.021) | .556*** (.025)  | .570*** (.020) | .413*** (.038)  |
| Fixed effects                             |                |                 |                |                 |
| Step 1 variables                          |                |                 |                |                 |
| perceived diversity : college             | -.155** (.054) | -.116* (.052)   | -.136** (.047) | -.094* (.048)   |
| perceived diversity                       | .029 (.037)    | .012 (.037)     | .023 (.034)    | .007 (.034)     |
| college                                   | .035 (.025)    | .017 (.025)     | .030 (.022)    | .009 (.022)     |
| Step 2 variables                          |                |                 |                |                 |
| male                                      |                | .065*** (.014)  |                | .067*** (.013)  |
| income                                    |                | -.014*** (.004) |                | -.012*** (.003) |
| race Black                                |                | .094*** (.020)  |                | .106*** (.017)  |
| race Hispanic                             |                | .021 (.020)     |                | .027 (.018)     |
| race White                                |                | -.012*** (.020) |                | -.116*** (.017) |
| Random effects                            |                |                 |                |                 |
| high school intercept                     | .004 (.061)    | .002 (.041)     | .079 (.282)    | .073 (.270)     |
| subject intercept                         | .096 (.310)    | .089 (.298)     | .003 (.056)    | .001 (.036)     |
| residual                                  | .134 (.367)    | .136 (.369)     | .125 (.354)    | .127 (.356)     |
| Number of observations                    |                |                 |                |                 |
| state-level                               | 49             | 49              | 49             | 49              |
| subject-level                             | 3735           | 3586            | 3773           | 3618            |
| number of obs                             | 6463           | 6233            | 7546           | 7236            |

Note. Regression analyses with inverse probability weighting. We assume missing values are missing at random conditional on observed covariates: gender and race. Both weighted and unweighted analyses are present in the table, giving same conclusions.

Table.S 10 – robustness check: placebo outcomes

|                               | stereotype dispersion | bright future | life as failure | enjoy life      |
|-------------------------------|-----------------------|---------------|-----------------|-----------------|
| Intercept                     | .565*** (.021)        | .030 (.040)   | 1.448*** (.028) | 4.286*** (.032) |
| Fixed effects                 |                       |               |                 |                 |
| perceived diversity : college | -.155** (.054)        | .014 (.128)   | -.062 (.087)    | .228* (.099)    |
| perceived diversity           | .029 (.037)           | -.036 (.079)  | .126* (.054)    | -.201** (.062)  |
| college                       | .035 (.025)           | -.011 (.060)  | -.228*** (.040) | -.275*** (.046) |
| Random effects                |                       |               |                 |                 |
| high school state intercept   | .004 (.061)           | .002 (.041)   | .002 (.609)     | .002 (.048)     |
| subject intercept             | .096 (.310)           | .131 (.362)   | .088 (.297)     | .168 (.410)     |
| residual                      | .134 (.367)           | .853 (.924)   | .371 (.609)     | .463 (.680)     |
| Number of observations        |                       |               |                 |                 |
| state-level                   | 49                    | 49            | 49              | 49              |
| subject-level                 | 3735                  | 3772          | 3772            | 3770            |
| number of obs                 | 6463                  | 6071          | 6071            | 6068            |

*Note.* In wave 1, on a scale from 1 (strongly agree) to 4 (disagree). In wave 5, on a scale from 0 (never) to 4 (all the time). All responses rescaled.

- Wave 1: You feel your future is limited. Wave 5: You felt hopeful about the future.
- Wave 1: All in all, I am inclined to feel that I am a failure. Wave 5: You thought your life had been a failure.
- Wave 1: On the whole, I am satisfied with myself. Wave 5: You enjoyed life.

We explored how stereotype dispersion, the mental maps on participants' heads relate to general attitudes in this section. Longitudinal survey in wave 5 asked 18 general attitudes. We report statistics below. The items, on a scale from 0 (totally disagree) to 10 (totally agree), include:

- If I had to do all over again, I would choose to attend (name of most recent college attended).
- My college experience has made me a better person.
- My college experience has made me more tolerant of other racial and ethnic groups.
- My college experience has improved my relationships with other racial and ethnic groups.
- I am very satisfied with the friends and acquaintances I made at college.
- My college experiences have prepared me for the future.
- College has given me a sense of mastery of the subjects I studied.
- College has better prepared me to deal with the real world.
- I am satisfied with the courses I took at college.
- I am satisfied with the professors I had at college.
- I am satisfied with the quality of instruction I received at college.
- I would recommend (name of most recent college attended) to a friend or relative as a place to attend college.
- I am likely to contribute to (name of most recent college attended)'s future fund raising efforts.
- How much interaction have you had over the past four years with members of the following group: whites? blacks? hispanics? asians? 0 (no interaction) to 10 (great deal of interaction).
- How do you see (name of most recent college attended)'s commitment to racial and ethnic diversity on campus? is diversity emphasized: 1 (way too little) to 3 (just enough) to 5 (way too much).

Table.S 11 – Relations between stereotype dispersion, at college senior years, and other general attitudes

|                                           | attend college  | better person   | tolerant other race | improve relations other race | happy with college friends |
|-------------------------------------------|-----------------|-----------------|---------------------|------------------------------|----------------------------|
| Intercept (female, average income, Asian) | 7.976*** (.142) | 8.815*** (.099) | 7.601*** (.147)     | 7.254*** (.155)              | 8.434*** (.102)            |
| Fixed effects                             |                 |                 |                     |                              |                            |
| stereotype dispersion                     | -.360** (.100)  | -.207** (.073)  | -.196† (.103)       | -.206* (.101)                | -.226** (.077)             |
| male                                      | -.005 (.110)    | -.110 (.080)    | -.434*** (.113)     | -.272* (.110)                | -.215* (.084)              |
| income                                    | .027 (.029)     | .009 (.021)     | -.072* (.030)       | -.095** (.029)               | .009 (.022)                |
| race Black                                | -.022 (.152)    | -.149 (.110)    | -.275 . (.157)      | -.183 (.153)                 | -.056 (.117)               |
| race Hispanic                             | .378* (.156)    | .034 (.114)     | -.095 (.162)        | .037 (.158)                  | .093 (.120)                |
| race White                                | .485** (.148)   | .107 (.108)     | .148 (.153)         | .128 (.149)                  | .204† (.084)               |
| Random effects                            |                 |                 |                     |                              |                            |
| high school state intercept               | .091 (.302)     | .024 (.156)     | .097 (.312)         | .204 (.451)                  | .014 (.120)                |
| residual                                  | 6.139 (2.478)   | 3.255 (1.804)   | 6.542 (2.558)       | 6.101 (2.488)                | 3.667 (1.915)              |
| Number of observations                    |                 |                 |                     |                              |                            |
| state-level                               | 49              | 49              | 49                  | 49                           | 49                         |
| number of obs                             | 2202            | 2202            | 2200                | 2202                         | 2202                       |

Table.S 12 – Relations between stereotype dispersion, at college senior years, and other general attitudes cont.

|                                           | prepared for future | mastery of subjects | deal real world | satisfied with courses | satisfied with professors |
|-------------------------------------------|---------------------|---------------------|-----------------|------------------------|---------------------------|
| Intercept (female, average income, Asian) | 7.757*** (.101)     | 7.203*** (.102)     | 6.873*** (.118) | 7.192*** (.097)        | 7.250*** (.101)           |
| Fixed effects                             |                     |                     |                 |                        |                           |
| stereotype dispersion                     | -.190* (.076)       | -.338*** (.078)     | -.067 (.083)    | -.259*** (.074)        | -.402*** (.071)           |
| male                                      | -.108 (.083)        | -.348*** (.085)     | .082 (.091)     | -.249** (.081)         | -.270*** (.078)           |
| income                                    | -.011 (.022)        | .022 (.022)         | -.008 (.024)    | -.010 (.021)           | -.007 (.020)              |
| race Black                                | .377** (.115)       | .166 (.118)         | .215† (.126)    | .274* (.112)           | -.038 (.108)              |
| race Hispanic                             | .432*** (.119)      | .462 (.122)         | .292* (.129)    | .578*** (.115)         | .418*** (.111)            |
| race White                                | .274* (.113)        | .355 (.115)         | .295* (.122)    | .619*** (.109)         | .474*** (.105)            |
| Random effects                            |                     |                     |                 |                        |                           |
| high school state intercept               | .017 (.130)         | .013 (.113)         | .067 (.258)     | .012 (.110)            | .043 (.207)               |
| residual                                  | 3.562 (1.888)       | 3.753 (1.937)       | 4.194 (2.048)   | 3.338 (1.827)          | 3.115 (1.765)             |
| Number of observations                    |                     |                     |                 |                        |                           |
| state-level                               | 49                  | 49                  | 49              | 49                     | 49                        |
| number of obs                             | 2201                | 2202                | 2201            | 2202                   | 2201                      |

Table.S 13 – Relations between stereotype dispersion, at college senior years, and other general attitudes cont.

|                                           | satisfied with college quality | recommend college to friends | contribute fund raise | interact with Whites |
|-------------------------------------------|--------------------------------|------------------------------|-----------------------|----------------------|
| Intercept (female, average income, Asian) | 7.347*** (.090)                | 8.070*** (.130)              | 6.120*** (.172)       | 8.578*** (.095)      |
| Fixed effects                             |                                |                              |                       |                      |
| stereotype dispersion                     | -.360*** (.070)                | -.328*** (.090)              | -.321** (.120)        | -.316*** (.062)      |
| male                                      | -.289*** (.077)                | -.013 (.098)                 | -.209 (.121)          | -.144* (.067)        |
| income                                    | .007 (.020)                    | .032 (.026)                  | .057† (.034)          | .074*** (.018)       |
| race Black                                | .238* (.107)                   | -.354*** (.136)              | -.311† (.182)         | -.070 (.097)         |
| race Hispanic                             | .481*** (.110)                 | .318* (.140)                 | .038 (.187)           | .567*** (.097)       |
| race White                                | .508*** (.105)                 | .402** (.133)                | .088 (.177)           | 1.086*** (.092)      |
| Random effects                            |                                |                              |                       |                      |
| high school state intercept               | .003 (.052)                    | .087 (.295)                  | .151 (.388)           | .073 (.270)          |
| residual                                  | 3.082 (1.756)                  | 4.942 (2.223)                | 8.763 (2.960)         | 2.972 (1.724)        |
| Number of observations                    |                                |                              |                       |                      |
| state-level                               | 49                             | 49                           | 49                    | 49                   |
| number of obs                             | 2202                           | 2201                         | 2199                  | 2776                 |



Table.S 14 – Relations between stereotype dispersion, at college senior years, and other general attitudes cont.

|                                           | interact with Blacks | interact with Hispanics | interact with Asians | college commitment to diversity |
|-------------------------------------------|----------------------|-------------------------|----------------------|---------------------------------|
| Intercept (female, average income, Asian) | 5.937*** (.117)      | 4.972*** (.129)         | 7.847*** (.137)      | .413*** (.038)                  |
| <b>Fixed effects</b>                      |                      |                         |                      |                                 |
| stereotype dispersion                     | -.194* (.079)        | -.467*** (.087)         | -.569*** (.087)      | .036*** (.011)                  |
| male                                      | -.618*** (.087)      | -.364*** (.096)         | -.009 (.095)         | .075*** (.021)                  |
| income                                    | -.054* (.023)        | -.061* (.025)           | -.015 (.025)         | -.019*** (.005)                 |
| race Black                                | 2.842*** (.121)      | 1.141*** (.133)         | -2.106*** (.133)     | .160*** (.029)                  |
| race Hispanic                             | .505*** (.125)       | 2.080*** (.137)         | -1.864*** (.137)     | .060* (.030)                    |
| race White                                | .058 (.119)          | -.024 (.131)            | -1.289*** (.131)     | -.132*** (.021)                 |
| <b>Random effects</b>                     |                      |                         |                      |                                 |
| high school state intercept               | .082 (.286)          | .098 (.314)             | .166 (.408)          | .001 (.038)                     |
| residual                                  |                      | 5.990 (2.448)           | 5.976 (2.445)        | .284 (.533)                     |
| <b>Number of observations</b>             |                      |                         |                      |                                 |
| state-level                               | 49                   | 49                      | 49                   | 49                              |
| number of obs                             | 2276                 | 2776                    | 2276                 | 2769                            |

## 9. Stereotype dispersion and well-being

Table.S 15 – Stereotype dispersion and well-being in Study 2

|                        |      | Life satisfaction |                |                |
|------------------------|------|-------------------|----------------|----------------|
| Intercept              |      | 3.616***(.030)    | 3.616***(.031) | 3.616***(.030) |
| Fixed effects          |      |                   |                |                |
| stereotype dispersion  |      | -.147*(.069)      |                |                |
| perceived diversity    |      |                   | .110***(.025)  |                |
| state diversity        |      |                   |                | .188 (.217)    |
| Random effects         |      |                   |                |                |
| state intercept        |      | .010 (.100)       | .013 (.114)    | .012 (.108)    |
| residual               |      | 1.016 (1.008)     | 1.003 (1.002)  | 1.017 (1.009)  |
| Number of observations |      |                   |                |                |
| state-level            | 50   |                   | 50             | 50             |
| individual-level       | 1471 |                   | 1471           | 1471           |

Note. See variables and interpretations in the main text. Statistical significance level: †  $p < .10$ , \*  $p < .05$ , \*\*  $p < .01$ , \*\*\*  $p < .001$ .

Table.S 16 – Stereotype dispersion and well-being in Study 3

|                                 | Life satisfaction |                |                |                |                |
|---------------------------------|-------------------|----------------|----------------|----------------|----------------|
| Intercept                       | 4.174***(.020)    | 4.161***(.027) | 4.197***(.017) | 4.227***(.024) | 4.285***(.032) |
| Fixed effects                   |                   |                |                |                |                |
| stereotype dispersion           | -.065**(.022)     |                |                | -.051†(.030)   |                |
| perceived diversity             |                   | -.060 (.051)   |                |                | -.201**(.062)  |
| college                         |                   |                | -.170***(.018) | -.147***(.030) | -.275***(.046) |
| stereotype dispersion : college |                   |                |                | -.039 (.040)   |                |
| perceived diversity : college   |                   |                |                |                | .228*(.100)    |
| Random effects                  |                   |                |                |                |                |
| state intercept                 | .003 (.052)       | .002 (.049)    | .002 (.049)    | .003 (.052)    | .002 (.048)    |
| individual intercept            | .159 (.399)       | .159 (.399)    | .171 (.413)    | .168 (.410)    | .168 (.410)    |
| residual                        | .474 (.689)       | .479 (.692)    | .458 (.677)    | .459 (.678)    | .463 (.680)    |
| Number of observations          |                   |                |                |                |                |
| state-level                     | 49                | 49             | 49             | 49             | 49             |
| individual-level                | 3719              | 3770           | 3770           | 3719           | 3770           |
| number of obs                   | 5949              | 6068           | 6141           | 5949           | 6068           |

## 10. Stereotype dispersion and positivity

Here, we provide visual inspections on the positivity effect. In country level, state level, and individual data, we found that less dispersed stereotype content maps tend to co-exist with more positive evaluations than neutral or negative evaluations. However, we did not observe the same pattern in longitudinal dataset. Accompanying Fig S.2-3, Fig S.5-6, please see figures (Fig S.12) below on pairwise comparisons between stereotype dispersion and ratings on warmth and competence. See statistics in the main text.

Fig.S 12 – Scatterplot matrix on positivity and stereotype dispersion.

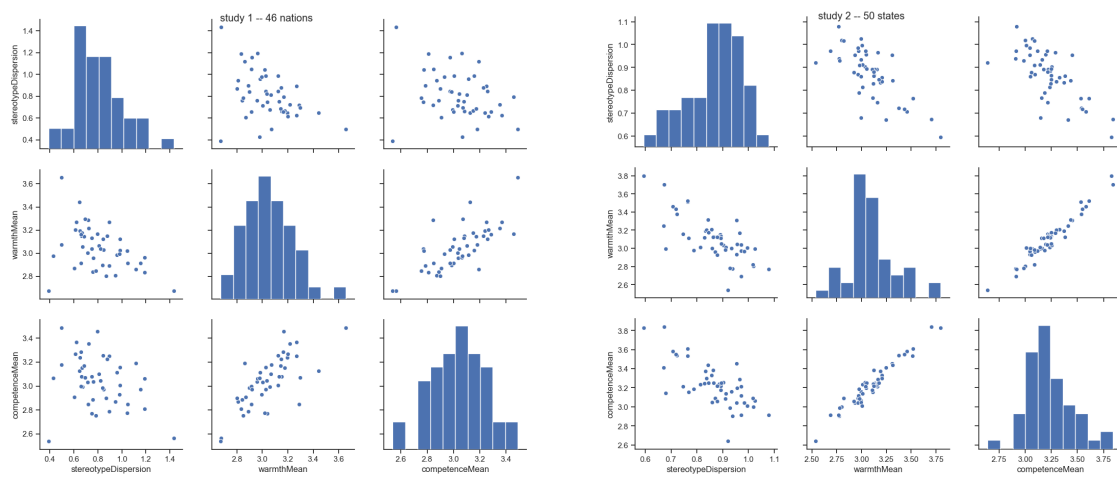

(a) positivity and dispersion in 46 nations

(b) positivity and dispersion in 50 states

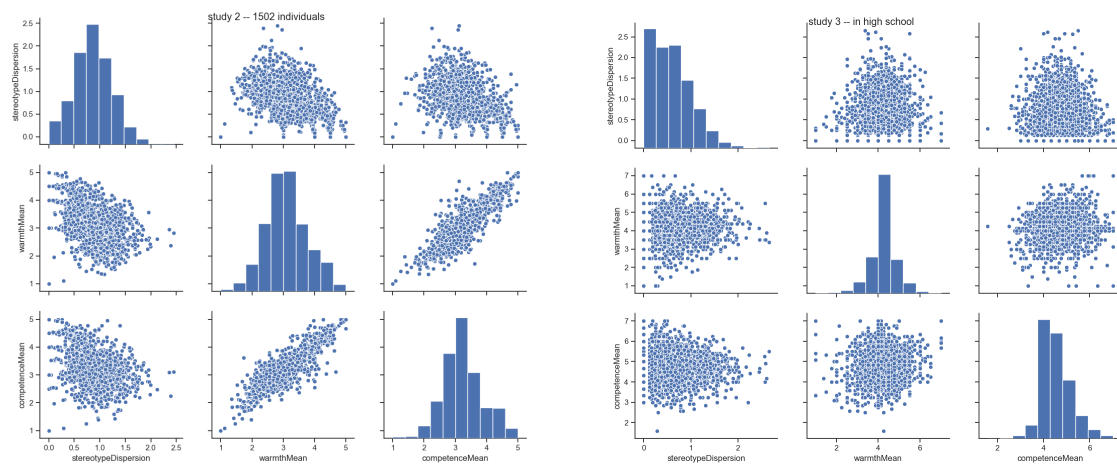

(c) positivity and dispersion in 1502 online Americans

(d) positivity and dispersion in 3924 high school students

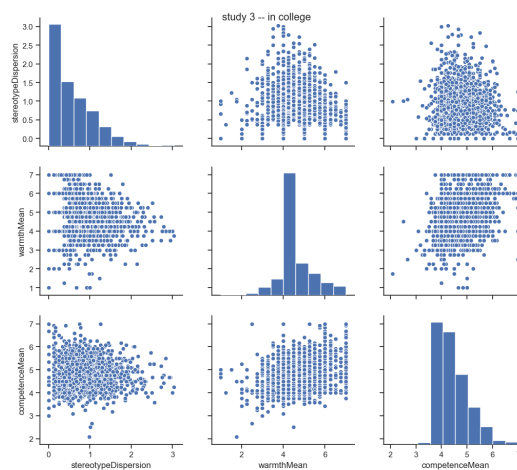

(e) positivity and dispersion in 3924 college students

## 11. Ingroup favoritism

We explore ingroup favoritism in this section. In studies 1 and 2, participants did not rate their ingroups over time, but in study 3, participants rated their ingroups at two time points. Therefore, we are able to explore whether greater diversity led to reduced ingroup favoritism. As diversity increase, do people become sober in their perceptions on ingroups?

Using data from Study 3, we analyzed whether [White/ Asian/Black/Hispanic] students favored their respective ingroup on either the warmth or competence dimension, if they perceive more ethnic diversity. Using multilevel modeling with error clustered at time period(pre/post), we found mixed effects, mostly statistically non-significant, except for Black students' ratings on ingroup's competence. Black students who perceive more campus diversity decreased ingroup favoritism (lower ratings) on the competence dimension.

- Whites: for each unit increase in perceived diversity, there is .181 unit decrease in perceived warmth ( $b = -.181, 95\%CI[-.383, .022], P = .079$ ), and .027 unit increase in perceived competence ( $b = .027, 95\%CI[-.183, .126], P = .734$ ) toward their ingroup.
- Asians: for each unit increase in perceived diversity, there is .124 increase in perceived warmth ( $b = .124, 95\%CI[-.105, .348], P = .285$ ) and .138 unit increase in perceived competence ( $b = .138, 95\%CI[-.073, .351], P = .200$ ) toward ingroup.
- Blacks: for each unit increase in perceived diversity, there is .134 increase in perceived warmth ( $b = .134, 95\%CI[-.083, .364], P = .239$ ) and .227 unit decrease in perceived competence ( $b = -.227, 95\%CI[-.420, -.038], P = .020$ ) toward ingroup.
- Hispanics: for each unit increase in perceived diversity, there is .060 increase in perceived warmth ( $b = .060, 95\%CI[-.177, .295], P = .617$ ) and .044 unit increase in perceived competence ( $b = .044, 95\%CI[-.145, .234], P = .651$ ) toward ingroup.

The above exploration makes us wonder, whether people are more likely to change perceptions about outgroups, but not ingroups. Ingroups already entail higher exposure, so the perceptions may be less malleable. In contrast, outgroup members receive higher exposure during diversity, therefore increasing the opportunity for perception changes. In a relative sense, increased outgroup perceptions indeed may decrease ingroup perceptions, as the reviewer suggests. Our data did not support this hypothesis, so it is an empirical question for future work.

## 12. Diversity perception accuracy

We explore perceived diversity in this section. In Study 2, we asked participants' perceived diversity. We also have an objective diversity, i.e., Herfindhal score in each state. We explored mismatches between the measures, and found some interesting patterns.

First of all, we found a moderate to small correlation between objective diversity and perceived diversity,  $r(1497) = .373, p < .001$ , indicating participants were moderately accurate in estimating diversity. Although we found participants to do a worse job in estimating perceived inequality,  $r(1497) = .146, p < .001$ .

Next, to create an accuracy measure, we first transformed the continuous state level Herfindhal index into 5-point likert scale, with the least diverse 10 states recoded into 1, to the most diverse 10 states recoded into 5. The two diversity measures are comparable, and the level of accuracy can be measured by the distance between perceived diversity and rescaled Herfindhal. On average, participants overestimate diversity ( $M = .314, SD = 1.524$ ).

We wonder what shapes perceptions of diversity. Prior research suggests immediate environments, media coverage, or individual beliefs in authoritarianism (Van Assche, et al., 2019). Among our measures, we found subjective social ladder and immediate living contexts to be important.

- Participants higher on self-report social ladder tend to overestimate diversity (1 bottom to 9 top:  $b = .068, 95\%CI[.0382, .0978], p < .001$ ).
- Participants who live in bigger cities tend to overestimate diversity (1 big city to 5 village:  $b = -.171, 95\%CI[-.220, -.121], p < .001$ ).
- No relation with age, gender, immigrant group, years of living, education, or objective income.
